# Supplementary material for: Cyromazine affects the ovarian germ cells of Drosophila via the ecdysone signaling pathway
Source: Front Physiol. 2022 Sep 29;13:992306. doi: 10.3389/fphys.2022.992306 (PMC9557234; doi:10.3389/fphys.2022.992306)
Supplement: Supplementary file 1 [file Table3.xlsx]

## Sheet: Sheet1
		Supplementary Table S3: Data quality control of ovaries samples of Drosophila melanogaster
		Sample	RawData	CleanData (%)	Q20 (%)	Q30 (%)	GC (%)
		CK-A1	45306922	45198232 (99.76%)	6606315233 (97.78%)	6332380695 (93.72%	3338557914 (49.41%)
		CK-A2	51594270	51464234 (99.75%)	7521975797 (97.78%)	7204036380 (93.65%)	3773064798 (49.05%)
		CK-A3	43348628	43250220 (99.77%)	6328110994 (97.93%)	6076779161 (94.04%)	2944055831 (45.56%)
		CK-L1	60790138	60605844 (99.70%)	8665767596 (97.70%)	8302237073 (93.60%)	4789396731 (54.00%)
		CK-L2	49461522	49327350 (99.73%)	7072256454 (97.83%)	6783916150 (93.84%)	3886470694 (53.76%)
		CK-L3	54681814	54402312 (99.49%)	7593367188 (97.72%)	7279310055 (93.68%)	4228706032 (54.42%)
		T-A1	55982882	55850262 (99.76%)	8155292192 (97.65%)	7796260666 (93.35%)	3771790066 (45.16%)
		T-A2	55217956	55080754 (99.75%)	8041019915 (97.75%)	7695051136 (93.54%)	3728821289 (45.33%)
		T-A3	55755542	55637416 (99.79%)	8128783375 (97.95%)	7804396217 (94.04%)	3728153090 (44.92%)
		T-L1	63953866	63751884 (99.68%)	9049878131 (97.62%)	8667461536 (93.49%)	4968414534 (53.59%)
		T-L2	45755722	45610200 (99.68%)	6526582172 (97.68%)	6254279985 (93.61%)	3600659351 (53.89%)
		T-L3	62962984	62805820 (99.75%)	9116474468 (97.32%)	8681034521 (92.67%)	4983024645 (53.19%)
			CK-L = denotes control groups in larvae
			T-L= denotes treated groups in larvae
			CK-A= denotes control groups in adults
			T-A= denotes treated groups in adults
