# Supplementary material for: Cyromazine affects the ovarian germ cells of Drosophila via the ecdysone signaling pathway
Source: Front Physiol. 2022 Sep 29;13:992306. doi: 10.3389/fphys.2022.992306 (PMC9557234; doi:10.3389/fphys.2022.992306)
Supplement: Supplementary file 6 [file Table4.xlsx]

## Sheet: Sheet1
Supplementary Table S4: Differential expression of cyromazine responsive genes in Drosophila's adult ovaries
Gene ID	Count (Control)	Count (Treatment)	FPKM (Control)	FPKM (Treatment)	log2(fc)	P-value	Symbol	Description
FBgn0010052	178.667	618.667	4.95667	14.9567	1.59335	7.28086e-10	Est-5A	NP_001163166.1 juvenile hormone esterase, isoform B [Drosophila melanogaster]
FBgn0039312	616	1688.33	25.1	60.5033	1.26933	1.70019e-08	--	NP_651371.1 uncharacterized protein Dmel_CG10514 [Drosophila melanogaster]
FBgn0004240	6.33333	82	0.723333	8.07667	3.48103	3.4314e-08	DptA	NP_476808.1 diptericin A [Drosophila melanogaster]
FBgn0052857	1039.67	3424.67	55.2967	157.747	1.51235	5.82216e-08	CG32500	AAF16622.1 TO42, partial [Drosophila melanogaster]
FBgn0038147	155.333	365.333	6.66	13.9233	1.06391	2.2638e-07	CCHa2	NP_001189216.1 CCHamide-2, isoform B [Drosophila melanogaster]
FBgn0000047	17	94.6667	0.586667	2.88	2.29546	2.61328e-07	Act88F	NP_524367.1 actin 88F [Drosophila melanogaster]
FBgn0023515	1944.67	644	29.8567	9.11333	-1.712	2.81846e-07	GCNA	NP_569947.2 uncharacterized protein Dmel_CG14814, isoform B [Drosophila melanogaster]
FBgn0002878	376.667	133.333	4.10333	1.33667	-1.61816	3.1685e-07	TOPBP1	AJP62086.1 FI23710p1, partial [Drosophila melanogaster]
FBgn0002466	482	176.667	4.23333	1.41667	-1.57929	9.35765e-07	CIT	NP_001261768.1 sticky, isoform B [Drosophila melanogaster]
FBgn0000140	1480.33	513	12.3767	3.94667	-1.64892	1.04839e-06	asp	NP_524488.3 abnormal spindle [Drosophila melanogaster]
FBgn0005633	12.6667	74.6667	0.683333	3.52333	2.36628	1.3428e-06	fln	XP_002095533.1 fln, isoform A [Drosophila yakuba]
FBgn0039311	475.333	1098.67	19.2033	39.45	1.03867	1.51745e-06	--	NP_651370.2 uncharacterized protein Dmel_CG10513 [Drosophila melanogaster]
FBgn0038827	395.667	133	4.56	1.41333	-1.68993	1.73257e-06	FANCD2	NP_996246.1 Fancd2 [Drosophila melanogaster]
FBgn0034497	129	319.667	5.15333	11.2367	1.12464	2.75684e-06	SLC25A3	NP_001286628.1 mitochondrial phosphate carrier protein 1, isoform B [Drosophila melanogaster]
FBgn0266111	704.667	252.667	5.93	1.95667	-1.59963	2.76191e-06	--	NP_610765.1 anastral spindle 3 [Drosophila melanogaster]
FBgn0031701	227	23	21.7433	2.18333	-3.31597	2.76222e-06	TotM	NP_001245887.1 turandot M, isoform B [Drosophila melanogaster]
FBgn0038390	414	147.667	8.13	2.67333	-1.60462	3.36237e-06	Rbf	NP_524372.1 Retinoblastoma-family protein 2 [Drosophila melanogaster]
FBgn0035186	147.333	368	9.96333	21.91	1.13689	4.49276e-06	--	NP_612079.1 uncharacterized protein Dmel_CG13912 [Drosophila melanogaster]
FBgn0052473	3940.67	1563.67	63.86	23.4633	-1.4445	4.64228e-06	ENPEP	NP_731787.1 uncharacterized protein Dmel_CG32473, isoform C [Drosophila melanogaster]
FBgn0037433	112.333	267	7.87	16.7267	1.08771	4.70474e-06	F40A3.3	NP_649644.1 uncharacterized protein Dmel_CG17919 [Drosophila melanogaster]
FBgn0004378	713.333	288	9.73	3.62667	-1.4238	5.52543e-06	Klp61F	NP_476818.1 Kinesin-like protein at 61F [Drosophila melanogaster]
FBgn0044812	505.667	71	47.4	6.53	-2.85973	6.23171e-06	TotC	NP_536779.2 turandot C [Drosophila melanogaster]
FBgn0038118	675.333	245.667	8.26333	2.76	-1.58206	6.68372e-06	TIMELESS	NP_524341.3 timeout [Drosophila melanogaster]
FBgn0010382	1301.33	513.333	19.0367	6.97	-1.44955	7.25103e-06	CycE	NP_001246037.1 cyclin E, isoform F [Drosophila melanogaster]
FBgn0261239	479.667	211.333	6.26	2.52667	-1.30893	7.33702e-06	Hr39	NP_476932.1 hormone receptor-like in 39, isoform A [Drosophila melanogaster]
FBgn0013684	38950	112853	1286.19	3201.16	1.31549	7.38572e-06	-	-
FBgn0028974	423.667	166.667	4.44	1.6	-1.47249	8.18437e-06	xmas-2	AEX98030.1 FI18133p1, partial [Drosophila melanogaster]
FBgn0014417	2672	1173.33	53.4433	21.6467	-1.30387	8.33127e-06	NAGLU	NP_001260251.1 uncharacterized protein Dmel_CG13397, isoform B [Drosophila melanogaster]
FBgn0015625	1860.33	704.333	38.67	13.5267	-1.51541	1.02129e-05	CycB3	NP_001262934.1 cyclin B3, isoform B [Drosophila melanogaster]
FBgn0263974	718.667	249	6.22667	1.99	-1.64569	1.05193e-05	--	NP_650735.3 qin [Drosophila melanogaster]
FBgn0004882	7073.33	2572.67	77.2733	26.1567	-1.56279	1.06397e-05	cpeb1-b	NP_001262870.1 oo18 RNA-binding protein, isoform G [Drosophila melanogaster]
FBgn0001086	1002.33	478	26.68	11.6567	-1.1946	1.2767e-05	Cdc20	NP_477501.1 fizzy [Drosophila melanogaster]
FBgn0022772	1279	586.333	21.4433	9.05667	-1.24348	1.31867e-05	Orc1	NP_477303.1 origin recognition complex subunit 1 [Drosophila melanogaster]
FBgn0038395	2623.33	6351.33	149.903	323.36	1.10911	1.46624e-05	to	NP_001303466.1 uncharacterized protein Dmel_CG10407, isoform C [Drosophila melanogaster]
FBgn0033458	1669	686.333	41.8667	15.82	-1.40405	1.46635e-05	--	NP_610529.1 uncharacterized protein Dmel_CG18446 [Drosophila melanogaster]
FBgn0040992	411.333	1064.67	27.81	62.5067	1.16841	1.47722e-05	--	NP_001286062.1 uncharacterized protein Dmel_CG10570, isoform C [Drosophila melanogaster]
FBgn0260228	411.333	1064.67	27.81	62.5067	1.16841	1.47722e-05	--	NP_001163011.1 uncharacterized protein Dmel_CG42502, isoform A [Drosophila melanogaster]
FBgn0025633	1564.67	612	19	6.78333	-1.48593	1.49357e-05	specc1l	NP_001036254.1 uncharacterized protein Dmel_CG13366, isoform B [Drosophila melanogaster]
FBgn0002873	2039	720	13.7	4.54667	-1.59129	1.81174e-05	--	NP_727769.3 mushroom body defect, isoform H [Drosophila melanogaster]
FBgn0011606	1057.33	455.333	13.1767	5.09333	-1.3713	2.02178e-05	kif4	NP_001284830.1 Kinesin-like protein at 3A, isoform B [Drosophila melanogaster]
FBgn0043535	59.3333	232.667	6.05667	20.3533	1.74867	2.07234e-05	Obp57a	NP_725966.1 Odorant-binding protein 57a [Drosophila melanogaster]
FBgn0001206	284.333	93	3.26	0.97	-1.74882	2.07458e-05	--	NP_572637.2 hybrid male rescue [Drosophila melanogaster]
FBgn0265102	359	134.333	4.69	1.58	-1.56966	2.33366e-05	ift122	NP_001286982.1 outer segment 1, isoform B [Drosophila melanogaster]
FBgn0261385	1018.67	497.667	13.1333	5.86	-1.16426	2.42247e-05	scra	NP_724582.1 scraps, isoform B [Drosophila melanogaster]
FBgn0259789	459	174	3.33667	1.15333	-1.5326	2.51004e-05	--	NP_001285466.1 zelda, isoform G [Drosophila melanogaster]
FBgn0004913	2178.67	961.333	35.88	14.5933	-1.29787	2.54433e-05	Gnf1	NP_001014605.1 germ line transcription factor 1, isoform B [Drosophila melanogaster]
FBgn0034853	705.667	253.333	8.29667	2.72667	-1.60539	2.57667e-05	Ice1	NP_611786.1 interacts with the C terminus of ELL 1 [Drosophila melanogaster]
FBgn0027521	1028.67	469.333	19.6767	8.25333	-1.25344	2.71033e-05	--	NP_001259603.1 uncharacterized protein Dmel_CG3679, isoform B [Drosophila melanogaster]
FBgn0000996	1749	744.333	33.1867	12.9567	-1.35691	2.87774e-05	cdt1	NP_001286451.1 double parked, isoform B [Drosophila melanogaster]
FBgn0005696	795.333	375.667	20.4467	8.85333	-1.20757	2.90995e-05	DNApol-alpha73	AGW24092.1 FI22303p1, partial [Drosophila melanogaster]
FBgn0263855	711.333	285	8.17	3	-1.44537	2.9856e-05	BUB1	NP_477382.1 Bub1-related kinase [Drosophila melanogaster]
FBgn0259113	971.667	345.667	11.1833	3.64667	-1.6167	3.24096e-05	DNApol-alpha180	NP_536736.2 DNA polymerase alpha 180kD [Drosophila melanogaster]
FBgn0003598	1644	680.333	18.5433	6.88333	-1.42972	3.42821e-05	Su(var)3-7	NP_524342.3 suppressor of variegation 3-7, isoform A [Drosophila melanogaster]
FBgn0002924	688	329	15.5833	6.82667	-1.19075	3.52119e-05	ncd	NP_001287592.1 non-claret disjunctional, isoform B [Drosophila melanogaster]
FBgn0260789	631.667	249.333	5.54	2.01	-1.46269	3.57397e-05	--	NP_001285043.1 multi sex combs, isoform B [Drosophila melanogaster]
FBgn0000182	4021.67	1500.33	54.01	18.6133	-1.53689	3.64998e-05	BicC	NP_476865.1 bicaudal C, isoform A [Drosophila melanogaster]
FBgn0004649	19420.7	7271.33	163.567	56.4567	-1.53466	3.66425e-05	yl	NP_996433.1 yolkless, isoform B [Drosophila melanogaster]
FBgn0036574	1538	615.667	19.5533	7.21	-1.43934	3.66612e-05	elg1	NP_996103.1 enhanced level of genomic instability 1, isoform C [Drosophila melanogaster]
FBgn0002906	560	187.333	6.16333	1.90333	-1.69518	3.71699e-05	Blm	NP_524319.2 bloom syndrome helicase [Drosophila melanogaster]
FBgn0261931	653.333	349	6.93333	3.39	-1.03226	3.84798e-05	HECW2	NP_572574.2 uncharacterized protein Dmel_CG42797, isoform D [Drosophila melanogaster]
FBgn0035357	1766.33	714.667	19.3	7.07667	-1.44746	3.87444e-05	mep-1	NP_001137875.1 MEP-1, isoform G [Drosophila melanogaster]
FBgn0030054	1331	513.333	17.3967	6.18667	-1.49158	3.92765e-05	chaf1a	NP_572495.1 chromatin assembly factor 1, p180 subunit [Drosophila melanogaster]
FBgn0266459	4012	1498.67	53.8433	18.59	-1.53424	4.06146e-05	--	NP_001285973.1 uncharacterized protein Dmel_CG45084, isoform A [Drosophila melanogaster]
FBgn0003189	4384.33	1884	33.04	13.0267	-1.34275	4.12112e-05	r	NP_001285343.1 rudimentary, isoform D [Drosophila melanogaster]
FBgn0261016	5586.33	2064.33	51.9467	17.9167	-1.53573	4.15345e-05	--	NP_001097246.3 closca [Drosophila melanogaster]
FBgn0050085	1164	494.333	13.3733	5.23	-1.35448	4.20638e-05	Rif1	NP_725497.1 Rap1 interacting factor 1 [Drosophila melanogaster]
FBgn0033526	805.333	329	17.12	6.46333	-1.40533	4.52798e-05	Chaf1b	AGR51651.1 FI22601p1, partial [Drosophila melanogaster]
FBgn0039640	3690.33	1554.33	55.75	21.82	-1.35332	4.53872e-05	ANPEP	NP_651674.3 uncharacterized protein Dmel_CG14516, isoform B [Drosophila melanogaster]
FBgn0260780	3198.67	1148.67	31.8567	10.5367	-1.59618	4.64291e-05	wisp	NP_001285144.1 wispy, isoform C [Drosophila melanogaster]
MSTRG.4543	17	60.6667	0.736667	2.44667	1.73173	4.66298e-05	--	-
FBgn0011604	1536.33	698.667	23.04	9.6	-1.26303	4.80974e-05	Iswi	NP_523719.1 imitation SWI, isoform A [Drosophila melanogaster]
FBgn0033757	2497.67	1006.33	43.7733	16.35	-1.42076	4.84015e-05	Mkln1	NP_610801.1 muskelin, isoform A [Drosophila melanogaster]
FBgn0250754	1085	415.333	5.30667	1.86	-1.5125	4.90379e-05	--	NP_001138060.1 uncharacterized protein Dmel_CG42232 [Drosophila melanogaster]
FBgn0034641	1927	847.667	19.64	7.92	-1.31022	4.90865e-05	mahj	NP_001246451.1 mahjong, isoform B [Drosophila melanogaster]
FBgn0005617	1296.33	509	16.9567	5.95333	-1.51008	5.12187e-05	msl-1	ABU97246.1 MSL1 [Drosophila melanogaster]
FBgn0004391	980.333	412.667	8.09	3.10667	-1.38077	5.23516e-05	Anapc1	NP_573025.2 shattered [Drosophila melanogaster]
FBgn0039227	1937.33	843.333	19.9367	8.02667	-1.31255	5.28906e-05	PBRM1	NP_651288.1 polybromo [Drosophila melanogaster]
FBgn0003701	665.333	256	7.98333	2.86333	-1.4793	5.56313e-05	thr	NP_001286552.1 three rows, isoform C [Drosophila melanogaster]
FBgn0038968	1962.33	738.667	16.43	5.64667	-1.54086	5.58737e-05	Urb1	NP_651044.1 uncharacterized protein Dmel_CG12499 [Drosophila melanogaster]
FBgn0039120	2849.67	1275	24.6467	10.4333	-1.24019	5.69154e-05	Nup98-96	NP_001262885.1 nucleoporin 98-96kD, isoform D [Drosophila melanogaster]
FBgn0260399	3210	1261.33	54.21	19.8567	-1.44894	6.20177e-05	Mastl	NP_524860.2 greatwall, isoform A [Drosophila melanogaster]
FBgn0040290	1035.67	418.667	10.9167	4.05	-1.43054	6.25284e-05	RECQL4	NP_652607.1 RecQ4 helicase [Drosophila melanogaster]
FBgn0026598	676.333	296	9.94333	4	-1.31373	6.33745e-05	Apc	NP_001334699.1 adenomatous polyposis coli 2, isoform C [Drosophila melanogaster]
FBgn0023395	559	212.667	9.69	3.37667	-1.5209	6.37405e-05	Chd3	NP_649111.1 Chd3 [Drosophila melanogaster]
FBgn0039644	5795	2216.33	61.42	21.99	-1.48186	6.42418e-05	l(2)03659	NP_651678.1 red dog mine, isoform B [Drosophila melanogaster]
FBgn0262743	4693	1969	56.9633	20.72	-1.45901	6.5924e-05	Fs(2)Ket	NP_001246108.1 female sterile (2) ketel, isoform D [Drosophila melanogaster]
FBgn0035842	491.667	192	4.63	1.68	-1.46255	6.9952e-05	sen1	NP_001137907.1 uncharacterized protein Dmel_CG7504, isoform B [Drosophila melanogaster]
FBgn0259745	2142.33	917.667	22.99	8.76667	-1.39091	7.02786e-05	wech	NP_001137614.1 wech, isoform D [Drosophila melanogaster]
FBgn0036624	569.667	252	7.44667	3.01667	-1.30364	7.16051e-05	--	NP_001261943.1 RING-associated factor 2, isoform C [Drosophila melanogaster]
FBgn0030486	1838.33	769.667	13.0367	4.95333	-1.3961	7.34721e-05	Set2	NP_572888.2 SET domain containing 2, isoform A [Drosophila melanogaster]
FBgn0039472	1.33333	352.333	0.0733333	16.09	7.77748	7.78102e-05	PNLIP	NP_651522.1 uncharacterized protein Dmel_CG17192 [Drosophila melanogaster]
FBgn0003268	742	329	6.06667	2.47	-1.29639	7.89867e-05	--	NP_476705.1 rough deal [Drosophila melanogaster]
FBgn0283531	1593.67	563.333	15.7333	5.18	-1.6028	7.97294e-05	Duox	NP_001259968.1 dual oxidase, isoform C [Drosophila melanogaster]
FBgn0031078	2262.33	1065	18.8633	8.11667	-1.21663	8.13439e-05	Nup205	NP_728308.1 nucleoporin 205kD, isoform B [Drosophila melanogaster]
FBgn0039302	5213.67	1987	32.4533	11.34	-1.51695	8.33912e-05	Nup358	NP_001247302.1 nucleoporin 358kD, isoform B [Drosophila melanogaster]
FBgn0011703	2579.33	1084.67	53.3267	20.5267	-1.37736	8.44975e-05	RnrL	NP_477027.1 ribonucleoside diphosphate reductase large subunit [Drosophila melanogaster]
FBgn0043854	330.667	112.667	4.24333	1.34	-1.66297	8.5157e-05	--	ABX00760.1 LD36405p [Drosophila melanogaster]
FBgn0029696	673.333	1556.67	72.4267	145.203	1.00348	8.97086e-05	--	ADB94045.1 MIP16731p, partial [Drosophila melanogaster]
FBgn0001169	743.667	381	7.69	3.45	-1.15639	9.01526e-05	H	NP_732533.1 hairless, isoform A [Drosophila melanogaster]
FBgn0016076	84.3333	205	4.14667	8.77	1.08062	9.13804e-05	--	NP_001137792.1 vrille, isoform D [Drosophila melanogaster]
FBgn0022213	2782.33	1135	45.81	17.1	-1.42167	9.18771e-05	Cse1	NP_523588.2 chromosome segregation 1 [Drosophila melanogaster]
FBgn0039544	967.333	466.333	15.9067	6.99333	-1.18558	9.2424e-05	REXO1	NP_001034073.1 uncharacterized protein Dmel_CG12877 [Drosophila melanogaster]
FBgn0002783	3188.67	1527	42.5533	18.8067	-1.17803	9.49984e-05	SMARCC2	NP_524373.1 moira, isoform A [Drosophila melanogaster]
FBgn0263600	941	391.333	14.4867	5.54667	-1.38503	9.52084e-05	DNApol-delta	NP_524099.2 DNA-polymerase-delta [Drosophila melanogaster]
FBgn0027512	7971.33	3026.33	83.7833	29.63	-1.4996	9.63166e-05	Ube2o	NP_651170.1 uncharacterized protein Dmel_CG10254, isoform A [Drosophila melanogaster]
FBgn0026433	917.667	411	14	5.75	-1.28379	9.7036e-05	--	NP_573030.2 Grip128 [Drosophila melanogaster]
FBgn0052344	1522	678.667	30.1467	12.2867	-1.2949	9.73715e-05	Ddx54	NP_612028.4 uncharacterized protein Dmel_CG32344 [Drosophila melanogaster]
FBgn0284220	6103	2408.33	64.9167	23.75	-1.45066	9.82605e-05	Top2	NP_001260580.1 topoisomerase 2, isoform B [Drosophila melanogaster]
FBgn0050183	820.667	359.333	8.41	3.39333	-1.3094	9.94561e-05	--	NP_001137745.2 uncharacterized protein Dmel_CG30183, isoform C [Drosophila melanogaster]
FBgn0015391	1096	466	12.8367	5.02333	-1.35355	9.95211e-05	Smc4	NP_723996.1 gluon [Drosophila melanogaster]
FBgn0032796	572.667	269.333	5.83667	2.50333	-1.22129	0.00010527	Arhgef18	NP_001260588.1 uncharacterized protein Dmel_CG10188, isoform C [Drosophila melanogaster]
FBgn0261987	7418.67	2998	143.51	53.8233	-1.41485	0.000107709	Pxt	NP_650648.3 Peroxinectin-like [Drosophila melanogaster]
FBgn0037924	891.667	362.667	11.0967	4.15667	-1.41663	0.000107762	--	NP_650096.1 uncharacterized protein Dmel_CG14712 [Drosophila melanogaster]
FBgn0024177	3800.67	1800	137.753	60.1567	-1.19529	0.000110689	zpg	NP_001261478.1 zero population growth, isoform B [Drosophila melanogaster]
FBgn0016070	7668.33	3007	85.5333	31.3233	-1.44925	0.000111168	smg	NP_001137924.1 smaug, isoform D [Drosophila melanogaster]
FBgn0039342	12.6667	899	1.12667	63.7633	5.82259	0.000111545	--	NP_651401.1 uncharacterized protein Dmel_CG5107 [Drosophila melanogaster]
FBgn0052023	42.3333	146.333	4.60667	13.5667	1.55827	0.000113635	--	NP_729415.2 uncharacterized protein Dmel_CG32023 [Drosophila melanogaster]
FBgn0034447	1069	506.667	21.8033	9.54667	-1.19148	0.000117531	samp-1	NP_611422.2 uncharacterized protein Dmel_CG7744 [Drosophila melanogaster]
FBgn0061200	1738	758.667	11.7333	4.67	-1.32912	0.000118316	Nup153	NP_001097002.1 nucleoporin 153kD, isoform D [Drosophila melanogaster]
FBgn0015270	370.333	168.333	9.89	4.10667	-1.268	0.000119653	Orc2	NP_731873.1 origin recognition complex subunit 2 [Drosophila melanogaster]
FBgn0014861	1884	928	34.5867	15.6133	-1.14744	0.000120577	Mcm2	NP_477121.1 minichromosome maintenance 2 [Drosophila melanogaster]
FBgn0250850	1581.33	673	20.3767	7.95667	-1.35668	0.000122913	rig	NP_611499.3 rigor mortis [Drosophila melanogaster]
FBgn0015925	744.333	332	19.71	8.07333	-1.28769	0.000124359	csul	NP_477184.1 capsuleen, isoform A [Drosophila melanogaster]
FBgn0003187	1083	492.667	17.4967	7.35	-1.25126	0.00012737	qua	NP_001246066.1 quail, isoform C [Drosophila melanogaster]
FBgn0027602	1220.67	576.667	16.6	7.25	-1.19513	0.000132733	CG8611	NP_788922.1 uncharacterized protein Dmel_CG8611, isoform B [Drosophila melanogaster]
FBgn0031435	681.333	305	23.9633	9.95333	-1.26758	0.000132975	Elba2	NP_608691.1 early boundary activity 2 [Drosophila melanogaster]
FBgn0261004	703.667	298.667	11.6633	4.56333	-1.35382	0.000134542	--	NP_649557.2 asterless [Drosophila melanogaster]
FBgn0013679	58585.3	150981	3549.69	7829.72	1.14127	0.000135654	-	-
FBgn0033661	1969.67	706	6.29667	2.03	-1.63311	0.000138005	MDN1	NP_001097279.2 uncharacterized protein Dmel_CG13185 [Drosophila melanogaster]
FBgn0262167	314	129.333	3.04333	1.14333	-1.41241	0.000138071	--	NP_651268.1 anastral spindle 1, isoform A [Drosophila melanogaster]
FBgn0034073	1221.67	518.667	20.5733	8.06667	-1.35073	0.000139409	CG8414	NP_611084.2 uncharacterized protein Dmel_CG8414 [Drosophila melanogaster]
FBgn0027548	1595.67	791	24.0933	10.59	-1.18593	0.000144174	nito	NP_001286174.1 spenito, isoform C [Drosophila melanogaster]
FBgn0011692	991	460.667	16.2967	7.00333	-1.21846	0.000145167	KIF23	NP_477025.1 pavarotti [Drosophila melanogaster]
FBgn0015664	1087	551.667	20.87	9.65667	-1.11183	0.000148444	--	NP_001260311.1 DNA replication-related element factor, isoform B [Drosophila melanogaster]
FBgn0004650	2724	933	21.84	6.93	-1.65605	0.000149907	--	NP_569901.1 female sterile (1) nasrat [Drosophila melanogaster]
FBgn0039207	3973	1632	40.52	15.3567	-1.39977	0.000151111	l(2)03659	NP_001247286.1 uncharacterized protein Dmel_CG5789, isoform B [Drosophila melanogaster]
FBgn0005596	1584	744.333	19.6333	8.55333	-1.19875	0.000151557	yem	NP_476893.1 yemanuclein, isoform A [Drosophila melanogaster]
FBgn0034199	74.6667	203.333	9.21	21.86	1.24702	0.000151609	--	NP_611194.1 Growth-blocking peptide 1 [Drosophila melanogaster]
FBgn0026418	6597.33	3194.33	109.413	48.88	-1.16247	0.000152829	HSPA4L	NP_001189103.1 Hsc70Cb, isoform G [Drosophila melanogaster]
FBgn0261938	761.667	345.333	9.06667	3.73333	-1.28011	0.000153198	POLRMT	NP_001259853.1 mitochondrial RNA polymerase, isoform B [Drosophila melanogaster]
FBgn0002183	3896.33	1800	57.6033	24.47	-1.23514	0.000153564	dre4	NP_476610.2 dre4, isoform A [Drosophila melanogaster]
FBgn0013765	1032.67	444	12.65	4.99333	-1.34106	0.000155185	cnn	NP_001246293.1 centrosomin, isoform L [Drosophila melanogaster]
FBgn0015799	1929.67	959.333	28.32	12.9267	-1.13147	0.000158105	Rbf	NP_525036.2 Retinoblastoma-family protein [Drosophila melanogaster]
FBgn0027500	2856.33	1364.67	40.7467	18.0467	-1.17495	0.000158266	--	NP_648906.1 spindle defective 2 [Drosophila melanogaster]
FBgn0002905	395	155.667	3.28667	1.18333	-1.47377	0.000158349	DNApol-theta	NP_524333.1 mutagen-sensitive 308 [Drosophila melanogaster]
FBgn0037327	1089.33	493.667	12.6267	5.24333	-1.26792	0.000158633	PEK	NP_649538.1 pancreatic eIF-2alpha kinase, isoform A [Drosophila melanogaster]
FBgn0040102	85.3333	196.333	4.04667	8.23333	1.02474	0.000160295	MBL2	NP_652641.1 lectin-24Db [Drosophila melanogaster]
FBgn0030242	486.333	192.333	11.2	4.12	-1.44278	0.000160726	PRC1	NP_001285092.1 sister of feo, isoform B [Drosophila melanogaster]
FBgn0029905	405.667	193	8.61333	3.73333	-1.20611	0.000163514	NFYC	NP_572354.1 nuclear factor Y-box C [Drosophila melanogaster]
FBgn0033845	1044.33	547	17.77	8.38667	-1.08327	0.000164744	mars	NP_001163142.1 mars, isoform B [Drosophila melanogaster]
FBgn0010328	3845.67	1938.33	33.3267	15.3467	-1.11875	0.0001653	Zmym4	NP_001097946.1 without children, isoform B [Drosophila melanogaster]
FBgn0086895	689	312.667	9.48	3.91	-1.27772	0.000166405	pea	NP_610928.1 peanuts [Drosophila melanogaster]
FBgn0259834	804.667	342.667	14.0967	5.46	-1.36838	0.000167366	--	NP_001285435.1 outsiders, isoform B [Drosophila melanogaster]
FBgn0042085	1083.33	420	10.87	3.85667	-1.49493	0.00016751	Arid2	NP_610216.1 brahma associated protein 170kD [Drosophila melanogaster]
FBgn0031051	1404.33	572	14.0967	5.29667	-1.4122	0.000169534	XPO5	NP_001285453.1 Ranbp21, isoform B [Drosophila melanogaster]
FBgn0025388	276	106.667	3.34667	1.18667	-1.49581	0.000169761	--	NP_572175.3 uncharacterized protein Dmel_CG12179, isoform C [Drosophila melanogaster]
FBgn0027783	787	368	11.3033	4.85667	-1.21871	0.000172799	SMC2	NP_610995.1 structural maintenance of chromosomes 2 [Drosophila melanogaster]
FBgn0039182	2238	977.333	25.7533	10.3167	-1.31978	0.000174305	Pdcd11	NP_651245.1 uncharacterized protein Dmel_CG5728 [Drosophila melanogaster]
FBgn0003483	1254	572	14.2333	5.95667	-1.2567	0.000176046	spn-E	NP_476741.1 spindle E [Drosophila melanogaster]
FBgn0261397	1682.33	705	14.07	5.39667	-1.38248	0.000177041	Myo5a	NP_724569.1 dilute class unconventional myosin, isoform C [Drosophila melanogaster]
FBgn0003015	23976.7	10352.3	436.56	175.82	-1.31208	0.000179589	osk	NP_731295.1 oskar, isoform A [Drosophila melanogaster]
FBgn0085358	2.66667	173.333	0.256667	15.6367	5.92889	0.000183345	Diedel	NP_001097028.1 diedel 3, isoform A [Drosophila melanogaster]
FBgn0041164	2956.67	1403.67	37.84	16.54	-1.19395	0.00018397	armi	NP_001014556.1 armitage, isoform B [Drosophila melanogaster]
FBgn0033766	1191	474	10.9733	3.99667	-1.45713	0.000184628	nup188	NP_001246283.1 nucleoporin 188kDa, isoform C [Drosophila melanogaster]
FBgn0037770	1361.33	582.667	25.7033	10.0367	-1.35668	0.00018643	Art4	NP_001262445.1 arginine methyltransferase 4, isoform B [Drosophila melanogaster]
FBgn0037137	4289.33	1803	77.1567	29.8133	-1.37183	0.000187037	--	NP_001262195.1 Nopp140, isoform E [Drosophila melanogaster]
FBgn0034734	1183.33	448.667	7.53	2.59667	-1.53599	0.000187227	Utp20	NP_611676.1 uncharacterized protein Dmel_CG4554 [Drosophila melanogaster]
FBgn0261698	311.333	111.333	2.49333	0.823333	-1.59853	0.000189632	KCNT1	NP_001097259.2 slowpoke 2, isoform D [Drosophila melanogaster]
FBgn0038631	145	349.333	11.7367	24.5767	1.06627	0.000190061	--	NP_650733.1 uncharacterized protein Dmel_CG7695 [Drosophila melanogaster]
FBgn0040268	738	368.667	10.1233	4.58	-1.14426	0.000192286	Top3alpha	NP_523602.2 topoisomerase 3alpha [Drosophila melanogaster]
FBgn0040232	667.667	292.333	5.02667	2.04	-1.30103	0.000192811	KIN7N	NP_524993.3 CENP-meta, isoform C [Drosophila melanogaster]
FBgn0261238	972.667	407.333	11.3133	4.27667	-1.40347	0.000192872	MLLT10	NP_001262332.1 alhambra, isoform P [Drosophila melanogaster]
FBgn0261530	879.667	418.333	18.0067	7.86	-1.19593	0.000193246	Nbn	NP_651973.4 nbs, isoform E [Drosophila melanogaster]
FBgn0022069	2592.33	1220.33	47.6933	20.6467	-1.20788	0.000193411	Nnp-1	NP_651976.1 Nnp-1 [Drosophila melanogaster]
FBgn0036486	1219	520	15.7467	6.21333	-1.34161	0.000195164	Msh6	NP_648755.1 Msh6 [Drosophila melanogaster]
FBgn0035918	530.667	288.667	11.47	5.66667	-1.01729	0.00019667	CDC6	NP_648247.1 Cdc6 [Drosophila melanogaster]
FBgn0262952	58676.3	136276	2479.33	4960.92	1.00066	0.000197006	-	-
FBgn0259785	2927.67	1391	40.6533	17.6967	-1.1999	0.00019775	--	NP_001262143.1 putzig, isoform B [Drosophila melanogaster]
FBgn0015553	848	353	18.61	7.19333	-1.37135	0.000198222	tos	NP_477145.1 tosca [Drosophila melanogaster]
FBgn0039125	698	338	18.68	8.32333	-1.16626	0.00019886	Ndc1	NP_651191.1 nuclear division cycle 1 [Drosophila melanogaster]
FBgn0024236	2565	1147.67	37.5367	15.55	-1.27139	0.000203266	foi	NP_001261584.1 fear-of-intimacy, isoform B [Drosophila melanogaster]
FBgn0266420	1324.67	700.333	44.7	21.73	-1.04059	0.000206049	Ote	NP_476664.2 otefin [Drosophila melanogaster]
FBgn0035073	702	331.333	11.21	4.86	-1.20576	0.000208611	TBC1D31	NP_611973.2 uncharacterized protein Dmel_CG16896 [Drosophila melanogaster]
FBgn0262647	1941.67	938	23.36	10.3667	-1.17209	0.000211175	Nup160	NP_001285832.1 nucleoporin 160kD, isoform B [Drosophila melanogaster]
FBgn0032748	945	401.667	11.89	4.61333	-1.36587	0.0002113	Zcchc2	NP_001097179.1 uncharacterized protein Dmel_CG10492, isoform B [Drosophila melanogaster]
FBgn0262519	4815.33	2187.33	39.65	16.47	-1.26748	0.000212229	Mi-2	NP_001163476.1 Mi-2, isoform C [Drosophila melanogaster]
FBgn0013732	777.333	314	12.8733	4.71333	-1.44957	0.000220001	--	NP_001260728.1 scrambled, isoform B [Drosophila melanogaster]
FBgn0003124	4522.67	2102.67	99.7467	42.9567	-1.21539	0.000220552	polo	NP_001014592.1 polo, isoform B [Drosophila melanogaster]
FBgn0000615	4981.67	2293	129.657	54.9667	-1.23807	0.000221112	exu	NP_001163218.1 exuperantia, isoform D [Drosophila melanogaster]
FBgn0040372	2477	975.667	19.7967	7.20667	-1.45785	0.000221673	Ehmt2	NP_001259088.1 G9a, isoform B [Drosophila melanogaster]
FBgn0031947	1089	527	20.44	9.06	-1.17381	0.000223237	BRD7	NP_609148.1 uncharacterized protein Dmel_CG7154 [Drosophila melanogaster]
FBgn0029113	3193.33	1624.33	72.7567	34	-1.09754	0.000223451	uba2-a	NP_524756.2 ubiquitin activating enzyme 2 [Drosophila melanogaster]
FBgn0023216	614.667	310.667	12.8967	5.98333	-1.10798	0.000223663	Parg	NP_001245511.1 Poly(ADP-ribose) glycohydrolase, isoform B [Drosophila melanogaster]
FBgn0264326	710.333	294.333	5.49667	2.09333	-1.39275	0.000225098	DNApol-epsilon255	NP_524462.2 DNA polymerase epsilon 255kD subunit [Drosophila melanogaster]
FBgn0027620	1963	865.667	20.34	8.30667	-1.29198	0.000225175	BAZ1A	NP_536734.2 ATP-dependent chromatin assembly factor large subunit [Drosophila melanogaster]
FBgn0267351	699	301.333	9.08333	3.62667	-1.32458	0.000229342	Topors	NP_001261083.1 topoisomerase I-interacting protein, isoform B [Drosophila melanogaster]
FBgn0004655	1405	615	12.8267	5.03333	-1.34956	0.000230069	wapl	NP_001284804.1 wings apart-like, isoform C [Drosophila melanogaster]
FBgn0264699	21.6667	66.3333	0.383333	1.04333	1.44453	0.000230461	--	NP_001262238.1 uncharacterized protein Dmel_CG43968 [Drosophila melanogaster]
FBgn0037810	5126.67	2122.67	56.56	21.6833	-1.3832	0.000232581	sle	NP_731472.1 slender lobes, isoform B [Drosophila melanogaster]
FBgn0035205	2054	1003	29.5367	13.21	-1.16088	0.000234441	CTR9	NP_788448.1 Ctr9, isoform A [Drosophila melanogaster]
FBgn0262955	2678.33	1349.33	37.77	17.3567	-1.12175	0.00023501	RpII140	NP_001287323.1 RNA polymerase II 140kD subunit, isoform B [Drosophila melanogaster]
FBgn0029789	459.333	232.667	6.68667	3.09	-1.11368	0.000235948	PGAP1	NP_572245.1 Post-GPI attachment to proteins 1 [Drosophila melanogaster]
FBgn0037025	364.333	132	3.16333	1.04667	-1.59564	0.000238483	--	NP_001262123.1 Spc105-related, isoform B [Drosophila melanogaster]
FBgn0038191	2242.67	1046	36.94	15.9767	-1.20922	0.00023998	--	NP_650324.1 uncharacterized protein Dmel_CG9925 [Drosophila melanogaster]
FBgn0021761	2075.67	878	25.0367	9.55	-1.39047	0.00024111	Nup154	NP_001285827.1 nucleoporin 154kD, isoform D [Drosophila melanogaster]
FBgn0263490	1386.67	605.667	10.57	4.25333	-1.31331	0.000241397	--	NP_001247289.1 molting defective, isoform D [Drosophila melanogaster]
FBgn0010926	1501.67	733	27.0867	12.1933	-1.15149	0.000246692	l(3)07882	NP_001303435.1 lethal (3) 07882, isoform B [Drosophila melanogaster]
FBgn0039559	2284	1156.33	26.2533	12.28	-1.09619	0.000246871	Mes-4	NP_733239.1 nuclear receptor binding SET domain protein, isoform A [Drosophila melanogaster]
FBgn0030228	647	298.667	11.4767	4.88667	-1.23178	0.000247592	BTBD9	NP_001259431.1 BTB (POZ) domain containing 9, isoform B [Drosophila melanogaster]
FBgn0086694	1159.33	529.667	16.7133	7.02667	-1.25009	0.000249834	Bre1	NP_001286950.1 Bre1, isoform B [Drosophila melanogaster]
FBgn0263236	981	439	16.9133	7.01	-1.27067	0.000249855	ANPEP	NP_001263065.1 SP1029, isoform D [Drosophila melanogaster]
FBgn0001233	76421	34448	1469.12	618.74	-1.24754	0.000250359	Hsp83	NP_001261362.1 heat shock protein 83, isoform B [Drosophila melanogaster]
FBgn0005674	3254.33	1369.33	34.24	13.44	-1.34915	0.000253549	GluProRS	NP_524471.2 Glutamyl-prolyl-tRNA synthetase, isoform A [Drosophila melanogaster]
FBgn0050497	2130.33	993	21.92	9.36	-1.22767	0.000256242	Tent5c	NP_610321.2 uncharacterized protein Dmel_CG46385, isoform A [Drosophila melanogaster]
FBgn0266526	2130.33	993	21.92	9.36	-1.22767	0.000256242	--	NP_001356960.1 uncharacterized protein Dmel_CG46385, isoform F [Drosophila melanogaster]
FBgn0039016	656	281	5.06667	1.98333	-1.35311	0.000260013	Dcr-1	NP_524453.1 Dicer-1 [Drosophila melanogaster]
FBgn0038146	1809	917	32.53	15.2033	-1.09738	0.000261353	WDR36	NP_650284.2 uncharacterized protein Dmel_CG9799 [Drosophila melanogaster]
FBgn0005390	4281.67	1612.67	39.1933	13.8333	-1.50246	0.000262994	--	NP_572284.4 female sterile (1) M3 [Drosophila melanogaster]
FBgn0038854	761.333	373.667	12.81	5.74	-1.15815	0.00026466	--	NP_650940.2 uncharacterized protein Dmel_CG7044 [Drosophila melanogaster]
FBgn0032026	6114.67	2848.67	70.9467	30.63	-1.21179	0.000268733	l(2)03659	NP_001245943.1 uncharacterized protein Dmel_CG7627, isoform B [Drosophila melanogaster]
FBgn0036124	1652.67	696.667	23.4933	9.14667	-1.36093	0.000271169	CEBPZ	NP_648431.3 uncharacterized protein Dmel_CG7839 [Drosophila melanogaster]
FBgn0036514	824	358.333	17.3367	6.94333	-1.32013	0.000271813	UTP14A	NP_648781.1 uncharacterized protein Dmel_CG12301 [Drosophila melanogaster]
FBgn0003023	3611	1374.67	61.1767	21.61	-1.50128	0.000272025	otu	NP_511089.2 ovarian tumor, isoform B [Drosophila melanogaster]
FBgn0265575	3770.33	1490	72.4	26.4433	-1.45309	0.000274494	yin	NP_001284844.1 yin, isoform D [Drosophila melanogaster]
FBgn0036686	1671.67	827.333	24.1333	10.98	-1.13615	0.000277212	BMS1	NP_648945.1 uncharacterized protein Dmel_CG7728 [Drosophila melanogaster]
FBgn0000392	2230	904.667	29.2867	11	-1.41274	0.000280353	cup	AAL39852.1 LD47924p [Drosophila melanogaster]
FBgn0086655	462.667	185.333	4.30667	1.49667	-1.52482	0.000281807	jing	NP_001097200.1 jing, isoform I [Drosophila melanogaster]
FBgn0003525	1849	882	36.8433	16.2967	-1.17683	0.000283113	stg	NP_001263066.1 string, isoform B [Drosophila melanogaster]
FBgn0000283	2179	1007	28.01	11.92	-1.23256	0.000283659	Cp190	NP_524359.2 centrosomal protein 190kD, isoform A [Drosophila melanogaster]
FBgn0035617	589.333	235.667	4.74667	1.74333	-1.44507	0.000284145	--	NP_647974.1 lethal (3) persistent salivary gland 2 [Drosophila melanogaster]
FBgn0086908	794	390.667	10.8367	4.83667	-1.16384	0.000284283	egg	NP_611966.3 eggless [Drosophila melanogaster]
FBgn0032919	1515	729.333	48.35	21.29	-1.18334	0.000286562	DDX47	NP_610090.1 uncharacterized protein Dmel_CG9253 [Drosophila melanogaster]
FBgn0020445	751.667	279.667	8.68333	3.02	-1.5237	0.000287765	E23	NP_524648.3 early gene at 23, isoform D [Drosophila melanogaster]
FBgn0013680	492	2946	28.0233	139.943	2.32014	0.000295034	-	-
FBgn0026252	10866.7	5079.33	143.893	62.24	-1.20909	0.000296333	Ipo7	NP_524780.1 moleskin [Drosophila melanogaster]
FBgn0015279	1315.67	623	15.89	6.86	-1.21184	0.00029818	PIK3CD	NP_001262770.1 Pi3K92E, isoform C [Drosophila melanogaster]
FBgn0039052	349	824.333	15.1333	31.0733	1.03795	0.000298608	Acy1a	NP_651123.1 uncharacterized protein Dmel_CG6733 [Drosophila melanogaster]
FBgn0030720	2071.33	948.667	41.92	17.6467	-1.24824	0.000301022	Ftsj3	NP_573099.1 uncharacterized protein Dmel_CG8939 [Drosophila melanogaster]
FBgn0034657	319.667	140	6.28333	2.52333	-1.3162	0.000301477	LBR	NP_726114.1 lamin B receptor, isoform C [Drosophila melanogaster]
FBgn0026370	3098	1414	42.12	16.8033	-1.32576	0.000301516	SRPK3	AAG15387.1 SR protein kinase 1 [Drosophila melanogaster]
FBgn0036958	1185.33	579.333	15.1467	6.85333	-1.14412	0.000303824	--	NP_730500.1 uncharacterized protein Dmel_CG17233, isoform C [Drosophila melanogaster]
FBgn0033169	605	282.333	15.3433	6.48667	-1.24206	0.000304831	--	NP_610276.1 uncharacterized protein Dmel_CG11123 [Drosophila melanogaster]
FBgn0036710	743.333	386.333	21.2433	10.1133	-1.07075	0.00030795	TMEM209	NP_648968.2 uncharacterized protein Dmel_CG6479, isoform A [Drosophila melanogaster]
FBgn0010830	557.667	287.667	12.13	5.67667	-1.09546	0.000314931	--	NP_649414.1 lethal (3) 04053 [Drosophila melanogaster]
FBgn0031377	568.333	232.667	7.01667	2.64333	-1.40843	0.000316531	EMSY	NP_608633.1 uncharacterized protein Dmel_CG15356 [Drosophila melanogaster]
FBgn0014466	3982	10959.7	194.433	472.503	1.28105	0.000317186	--	ACI31291.1 IP19118p, partial [Drosophila melanogaster]
FBgn0035766	1451	678.333	22.01	9.46333	-1.21774	0.000321948	eco	NP_648106.1 establishment of cohesion, isoform A [Drosophila melanogaster]
FBgn0003733	705.667	277.667	11.85	4.32667	-1.45356	0.000324827	tor	NP_476762.1 torso, isoform A [Drosophila melanogaster]
FBgn0260743	1369.67	679.333	45.7567	21.28	-1.10448	0.000325393	SLC25A22	NP_001262490.1 glutamate carrier 1, isoform B [Drosophila melanogaster]
FBgn0031389	59	150.667	3.02	6.87667	1.18716	0.000328828	CLIPB4	NP_001259904.1 uncharacterized protein Dmel_CG4259, isoform B [Drosophila melanogaster]
FBgn0031940	8.33333	38	0.44	1.78	2.0163	0.000333972	Acp1	NP_609141.1 uncharacterized protein Dmel_CG7214 [Drosophila melanogaster]
FBgn0010762	712.333	376.667	9.60333	4.52	-1.08721	0.000337467	Gatad2b	NP_001261685.1 simjang, isoform E [Drosophila melanogaster]
FBgn0003612	2141	1006	44.6967	19.01	-1.23341	0.000339102	Pias1	NP_724750.1 suppressor of variegation 2-10, isoform D [Drosophila melanogaster]
FBgn0026317	1346.33	656.667	18.3	8.21333	-1.1558	0.000339609	TSC1	NP_477415.1 Tsc1 [Drosophila melanogaster]
FBgn0001226	6678.33	2478.33	280.847	98.83	-1.50676	0.000346727	Hsp27	NP_001287001.1 heat shock protein 27, isoform B [Drosophila melanogaster]
FBgn0261243	2155	1002	31.33	13.3033	-1.23576	0.000347875	NPEPPS	NP_728614.1 puromycin sensitive aminopeptidase, isoform C [Drosophila melanogaster]
FBgn0033737	1230	672.667	32.04	16.0067	-1.0012	0.000348125	Nup54	NP_610783.1 nucleoporin 54kD [Drosophila melanogaster]
FBgn0263747	184.333	65.6667	1.97667	0.653333	-1.59718	0.000350259	Abca8a	NP_788912.2 uncharacterized protein Dmel_CG43672 [Drosophila melanogaster]
FBgn0042177	5869.67	2666.67	84.3467	35.22	-1.25994	0.000351135	IPO4	NP_001261957.1 artemis, isoform B [Drosophila melanogaster]
FBgn0011020	483	245	9.18667	4.26333	-1.10756	0.000358298	--	NP_649701.2 spindle assembly abnormal 4 [Drosophila melanogaster]
FBgn0000568	1144	597.333	30.88	14.7633	-1.06465	0.000359646	Eip75B	NP_001246821.1 Ecdysone-induced protein 75B, isoform E [Drosophila melanogaster]
FBgn0022768	947.333	520.333	9.53	4.72333	-1.01267	0.000365709	PPM1D	NP_001284867.1 protein phosphatase 2C, isoform B [Drosophila melanogaster]
FBgn0020616	694	348	10.2333	4.66667	-1.13281	0.000370968	STAG1	NP_477268.2 stromalin [Drosophila melanogaster]
FBgn0284256	4426.33	2114.67	52.5967	23.1333	-1.185	0.000376832	lrpprc	NP_523596.2 bicoid stability factor [Drosophila melanogaster]
FBgn0013756	2679	1157	18.9133	7.46	-1.34216	0.000377098	Mtor	NP_001260903.1 megator, isoform B [Drosophila melanogaster]
FBgn0039566	1433	710.667	24.4467	11.0967	-1.13951	0.00037857	EFTUD2	NP_651605.1 uncharacterized protein Dmel_CG4849 [Drosophila melanogaster]
FBgn0003277	2036	919.667	16.1833	6.66333	-1.28019	0.000382405	RpII215	NP_511124.1 RNA polymerase II 215kD subunit [Drosophila melanogaster]
FBgn0003655	3735	1734.33	96.5933	41.8133	-1.20796	0.000382481	swa	NP_511060.2 swallow [Drosophila melanogaster]
FBgn0039680	579.333	244.667	7.21333	2.77667	-1.37731	0.000387575	ncapd2	NP_651709.1 CAP-D2 condensin subunit [Drosophila melanogaster]
FBgn0032752	561	255.333	7.38667	3.1	-1.25266	0.000388033	Insr	NP_001188841.1 uncharacterized protein Dmel_CG10702, isoform D [Drosophila melanogaster]
FBgn0001341	1431.33	640	20.5333	8.48	-1.27583	0.000390075	Mybbp1A	AAA63150.1 lethal(1)1Bi protein [Drosophila melanogaster]
FBgn0034249	315.333	140.667	4.62667	1.89667	-1.28651	0.000400058	ARHGAP19	NP_001261060.1 Rho GTPase activating protein at 54D, isoform C [Drosophila melanogaster]
FBgn0003312	988.333	508	21.52	10.2033	-1.07664	0.000407199	sad	NP_650123.1 shadow [Drosophila melanogaster]
FBgn0086613	758.667	335.333	7.68333	3.12	-1.30019	0.000408218	Ino80	NP_732413.1 INO80 complex subunit [Drosophila melanogaster]
FBgn0039696	312.667	144.333	5.30667	2.22667	-1.25292	0.000422189	--	NP_651726.1 R and B [Drosophila melanogaster]
FBgn0035464	757.333	332	18.0733	7.29667	-1.30855	0.000423512	PIG-B	NP_647832.1 phosphatidylinositol glycan anchor biosynthesis class B, isoform A [Drosophila melanogaster]
FBgn0037926	1421	706.667	19.24	8.76	-1.13511	0.000426085	Elp1	NP_001262478.1 elongator complex protein 1, isoform C [Drosophila melanogaster]
FBgn0283724	1045	462.667	10.62	4.35333	-1.28659	0.000441698	CCDC88C	NP_647780.1 girdin, isoform A [Drosophila melanogaster]
FBgn0015477	2195.67	1005.33	15.0367	6.31	-1.25277	0.000444587	DNAJC13	NP_610467.1 receptor mediated endocytosis 8, isoform A [Drosophila melanogaster]
FBgn0026147	2214.33	1062.33	35.1433	15.4933	-1.1816	0.000449019	TTLL4	NP_001162947.1 tubulin tyrosine ligase-like 4A, isoform H [Drosophila melanogaster]
FBgn0020392	2646.33	1351.33	77.53	36.3667	-1.09214	0.000451006	Nmt	NP_523969.1 N-myristoyl transferase [Drosophila melanogaster]
FBgn0025815	1831.67	953	34.8667	16.64	-1.06719	0.000461345	Mcm6	NP_511065.1 minichromosome maintenance 6 [Drosophila melanogaster]
FBgn0015929	2491.33	1237	46.9367	21.45	-1.12974	0.000462194	dpa	NP_001286160.1 disc proliferation abnormal, isoform B [Drosophila melanogaster]
FBgn0027342	537.667	273.333	7.26333	3.39333	-1.09793	0.000463064	fz4	NP_511068.2 frizzled 4, isoform A [Drosophila melanogaster]
FBgn0025641	848.667	396	8.52667	3.64333	-1.22672	0.000465613	Daam1	NP_001188522.1 dishevelled associated activator of morphogenesis, isoform D [Drosophila melanogaster]
FBgn0085430	854.667	378.333	4.41	1.77	-1.31703	0.00047155	ZSWIM8	NP_001356949.1 uncharacterized protein Dmel_CG34401, isoform C [Drosophila melanogaster]
FBgn0011817	464.333	208.667	7.32667	2.77333	-1.40154	0.000473933	NLK	NP_001356976.1 nemo, isoform I [Drosophila melanogaster]
FBgn0031741	230	94.3333	4.95	1.84667	-1.42251	0.000479943	DPP4	NP_001285638.1 uncharacterized protein Dmel_CG11034, isoform C [Drosophila melanogaster]
FBgn0034883	30.3333	83.3333	1.66667	4.06333	1.2857	0.00048018	AQP	NP_788433.2 entomoglyceroporin 2, isoform C [Drosophila melanogaster]
FBgn0266580	4017	2019	35.38	16.43	-1.1066	0.000483082	Gp210	AAR82780.1 LD22358p, partial [Drosophila melanogaster]
FBgn0034529	394.667	174	4.54333	1.84333	-1.30143	0.000485361	CG16742	NP_611496.1 family with sequence similarity 21 [Drosophila melanogaster]
FBgn0002948	1000	475.667	22.3767	9.78	-1.19409	0.000485515	nod	NP_001285129.1 no distributive disjunction, isoform B [Drosophila melanogaster]
FBgn0035145	1155.67	567	11.2433	5.01667	-1.16427	0.000487055	MED14	NP_728534.2 mediator complex subunit 14, isoform C [Drosophila melanogaster]
FBgn0037141	530.333	252.333	9.13333	4.00667	-1.18874	0.000489946	DNApol-eta	NP_649371.2 DNApol-eta [Drosophila melanogaster]
FBgn0050195	94.6667	224.333	9.20333	19.0033	1.04602	0.000490822	--	NP_611696.2 uncharacterized protein Dmel_CG30195 [Drosophila melanogaster]
FBgn0037601	116.333	272	3.10333	6.23667	1.00696	0.000495409	Cyp313b1	NP_001287239.1 Cyp313b1, isoform B [Drosophila melanogaster]
FBgn0033688	3491	1498.33	25.1567	9.82333	-1.35666	0.000496472	PRPF8	NP_610735.1 pre-mRNA processing factor 8 [Drosophila melanogaster]
FBgn0032050	2726	1385	63.4867	29.7167	-1.09518	0.00049752	CG13096	NP_001285757.1 uncharacterized protein Dmel_CG13096, isoform B [Drosophila melanogaster]
FBgn0030320	1180.33	560.667	17.44	7.68333	-1.1826	0.000501251	--	NP_001245625.1 uncharacterized protein Dmel_CG2247, isoform B [Drosophila melanogaster]
FBgn0039634	1294.33	624	21.3433	9.46667	-1.17286	0.000507714	Man1b1	NP_651667.1 alpha-Mannosidase class I b [Drosophila melanogaster]
FBgn0003545	506.667	236.333	12.5967	5.41	-1.21934	0.000508612	sub	NP_001286548.1 subito, isoform B [Drosophila melanogaster]
FBgn0004875	1756	796.667	12.7	5.29	-1.26349	0.000514674	enc	NP_001261376.1 encore, isoform F [Drosophila melanogaster]
FBgn0264495	1685.67	715.667	11.17	4.28333	-1.38282	0.000516809	gpp	NP_731085.2 grappa, isoform D [Drosophila melanogaster]
FBgn0029088	648.333	323	7.04667	3.22667	-1.1269	0.00052024	disp	NP_524734.2 dispatched [Drosophila melanogaster]
FBgn0026196	5880.67	3115.67	171.847	83.7567	-1.03685	0.00052127	NOP58	XP_002078443.1 uncharacterized protein Dsimw501_GD22532 [Drosophila simulans]
FBgn0025639	1814.67	848.667	15.94	6.81	-1.22692	0.000521607	Hmt4-20	AEZ00750.2 FI18405p1 [Drosophila melanogaster]
FBgn0052479	1293	554	9.89667	3.74667	-1.40134	0.000521899	USP10	NP_001261229.1 ubiquitin specific protease 10, isoform C [Drosophila melanogaster]
FBgn0004598	3552	1723.67	33.4967	14.96	-1.16291	0.000522824	Fur2	NP_727963.1 furin 2, isoform A [Drosophila melanogaster]
FBgn0285917	1550.33	734.333	11.06	5.10667	-1.1149	0.00052434	Znf608	NP_001261074.1 scribbler, isoform J [Drosophila melanogaster]
FBgn0243511	1406	718.333	21.22	9.97333	-1.08928	0.000524843	psidin	NP_650858.1 phagocyte signaling impaired [Drosophila melanogaster]
FBgn0038872	749	343.333	8.57667	3.60667	-1.24975	0.000525809	Nelf-A	NP_650958.2 negative elongation factor A, isoform A [Drosophila melanogaster]
FBgn0011836	707.667	343.667	9.75667	4.31	-1.1787	0.000526254	Taf2	NP_001261668.1 TBP-associated factor 2, isoform B [Drosophila melanogaster]
FBgn0035253	1369.33	696	20.0167	9.45	-1.08282	0.00053266	Srrm2	NP_001097475.2 uncharacterized protein Dmel_CG7971, isoform F [Drosophila melanogaster]
FBgn0001078	1099	506	16.62	7.06667	-1.23382	0.000532894	ftz-f1	NP_524143.2 ftz transcription factor 1, isoform B [Drosophila melanogaster]
FBgn0000541	3665.67	1866.67	23.6633	10.9267	-1.1148	0.000533129	E(bx)	NP_001261188.1 enhancer of bithorax, isoform H [Drosophila melanogaster]
FBgn0010660	1229.67	572.667	12.2733	5.23	-1.23064	0.00053339	Nup214	NP_652039.2 nucleoporin 214kD [Drosophila melanogaster]
FBgn0026083	4044	1966.33	29.76	12.29	-1.27589	0.000533421	--	NP_001162657.1 twenty-four, isoform C [Drosophila melanogaster]
FBgn0034401	1334.33	625.667	20.9667	8.96667	-1.22545	0.00053441	MARS1	NP_611382.1 Methionyl-tRNA synthetase [Drosophila melanogaster]
FBgn0032208	6658	2967	41.87	17.1633	-1.28659	0.000542848	Ufd4	NP_609369.1 ubiquitin fusion-degradation 4-like [Drosophila melanogaster]
FBgn0038244	2696.33	1454	32.9433	16.37	-1.00893	0.000549138	--	NP_650375.1 uncharacterized protein Dmel_CG7987, isoform A [Drosophila melanogaster]
FBgn0051163	931.333	414	8.95	3.99667	-1.16309	0.000556428	Sash1	NP_001036742.2 shal K[+] channel interacting protein, isoform E [Drosophila melanogaster]
FBgn0003044	1405.67	632.333	18.13	7.43333	-1.2863	0.000560971	Pcl	NP_001261067.1 polycomblike, isoform B [Drosophila melanogaster]
FBgn0020306	5460.67	2376.33	31.0867	12.2567	-1.34273	0.000563744	dom	NP_001286676.1 domino, isoform G [Drosophila melanogaster]
FBgn0039141	959	469.667	15.58	7.13333	-1.12705	0.000570649	spas	NP_651206.3 spastin, isoform B [Drosophila melanogaster]
FBgn0027079	1631	777.667	25.9133	11.3033	-1.19695	0.000574484	Vars1	NP_001260946.1 Valyl-tRNA synthetase, isoform C [Drosophila melanogaster]
FBgn0039154	16.6667	86	1.33333	5.87	2.13832	0.000579355	--	NP_651219.1 Niemann-Pick type C-2f [Drosophila melanogaster]
FBgn0035901	931.333	435.667	17.7767	7.67	-1.21269	0.000581629	PUS7	NP_648231.1 pseudouridine synthase 7 [Drosophila melanogaster]
FBgn0004107	1184.67	595.333	53.1	24.5633	-1.11221	0.000582491	Cdk2	NP_001163666.1 Cyclin-dependent kinase 2, isoform C [Drosophila melanogaster]
FBgn0035420	737.333	340	5.40667	2.28	-1.24571	0.000583125	Kiaa0100	NP_001303402.1 hobbit, isoform C [Drosophila melanogaster]
FBgn0032863	505.333	273	12.1567	5.92	-1.03808	0.000585695	CDC23	ACL68756.1 RE62467p, partial [Drosophila melanogaster]
FBgn0002872	1177.67	512	15.14	6.09	-1.31385	0.000588414	--	NP_523887.2 mutator 2, isoform A [Drosophila melanogaster]
FBgn0026575	1586.33	788.333	10.5767	4.83333	-1.12979	0.000593006	hang	NP_001138204.1 hangover, isoform C [Drosophila melanogaster]
FBgn0016983	4110	2044	68.7533	31.42	-1.12975	0.000594721	NVL	NP_523959.2 smallminded, isoform A [Drosophila melanogaster]
FBgn0030081	658.333	341	17.0967	8.13667	-1.07121	0.000597015	--	NP_572520.1 uncharacterized protein Dmel_CG7246 [Drosophila melanogaster]
FBgn0027537	2057.33	1058.33	39.1367	18.5067	-1.08048	0.000602941	Nup93-1	NP_572929.1 nucleoporin 93kD-1 [Drosophila melanogaster]
FBgn0038296	207	79.3333	2.47667	0.88	-1.49282	0.000607233	Rnf123	NP_001247116.1 uncharacterized protein Dmel_CG6752, isoform B [Drosophila melanogaster]
FBgn0087008	2037.33	910.333	15.1333	6.16667	-1.29517	0.000607655	e(y)3	NP_001259719.1 enhancer of yellow 3, isoform C [Drosophila melanogaster]
FBgn0037371	622.333	303	8.30667	3.70667	-1.16415	0.000608813	Sym	NP_649580.1 symplekin [Drosophila melanogaster]
FBgn0260634	737	331.333	4.76667	1.88667	-1.33714	0.000615437	Eif4g1	NP_001287489.1 eukaryotic translation initiation factor 4G2, isoform C [Drosophila melanogaster]
FBgn0052133	419	167.333	2.78333	1.01	-1.46246	0.000616188	paxip1	NP_729947.2 PAX transcription activation domain interacting protein [Drosophila melanogaster]
FBgn0260970	1939.67	943.333	11.0633	4.91667	-1.17003	0.000618556	Ubr3	NP_572428.3 Ubr3 ubiquitin ligase, isoform A [Drosophila melanogaster]
FBgn0027088	2176.67	1105.67	47.19	21.88	-1.10887	0.000619901	gars-1	NP_001261867.1 Glycyl-tRNA synthetase, isoform C [Drosophila melanogaster]
FBgn0001218	10182.3	4790.67	176.657	77.3167	-1.1921	0.000620738	Hsc70-3	NP_001285139.1 heat shock 70-kDa protein cognate 3, isoform E [Drosophila melanogaster]
FBgn0263144	2144	1155.33	21.0467	10.3667	-1.02164	0.000621264	bin3	NP_001260724.1 bicoid-interacting protein 3, isoform C [Drosophila melanogaster]
FBgn0027090	2345.67	1257.67	50.71	24.9733	-1.02188	0.000621409	GlnRS	NP_524841.1 Glutaminyl-tRNA synthetase [Drosophila melanogaster]
FBgn0086251	1736.67	717	28.76	11.05	-1.38002	0.000623063	del	NP_001260666.1 deadlock, isoform C [Drosophila melanogaster]
FBgn0044324	2513.33	1346.67	34.5167	17.01	-1.02091	0.000624517	--	NP_001262226.1 chromator, isoform D [Drosophila melanogaster]
FBgn0000709	1049.67	492.667	11.5733	4.97667	-1.21755	0.000634762	fliI	NP_525097.1 flightless I [Drosophila melanogaster]
FBgn0024510	414.667	193.333	5.52	2.35333	-1.22996	0.000636635	dlt	NP_728672.1 discs lost [Drosophila melanogaster]
FBgn0035627	296.333	134	7.20333	3.00333	-1.2621	0.00064218	--	NP_523935.1 separase [Drosophila melanogaster]
FBgn0035106	994.667	426.333	4.68667	1.79333	-1.38592	0.00064646	rno	NP_001246528.1 rhinoceros, isoform D [Drosophila melanogaster]
FBgn0260396	15.3333	81	1.91667	8.64667	2.17354	0.000650852	--	NP_001163407.1 uncharacterized protein Dmel_CG42521 [Drosophila melanogaster]
FBgn0266282	487.667	244.333	7.21667	3.32	-1.12015	0.000655089	Smc6	NP_651228.1 java no jive [Drosophila melanogaster]
FBgn0000546	3001.67	1472.33	43.2367	19.3667	-1.15868	0.00065607	EcR	NP_001163061.1 ecdysone receptor, isoform G [Drosophila melanogaster]
FBgn0028426	534.667	261	10.5833	4.70333	-1.17004	0.000656201	RNaseZ	NP_724916.1 ribonuclease Z [Drosophila melanogaster]
FBgn0030687	875.667	434	10.5033	4.78667	-1.13375	0.000660441	POLR3A	NP_001096987.2 RNA polymerase III subunit C160 [Drosophila melanogaster]
FBgn0002044	1860.67	959.667	24.3167	11.5133	-1.07864	0.000664896	swm	NP_001260586.1 second mitotic wave missing, isoform C [Drosophila melanogaster]
FBgn0003353	234.333	114	4.28	1.91	-1.16404	0.000669826	KCNH6	NP_001286814.1 seizure, isoform C [Drosophila melanogaster]
FBgn0033774	123.667	5862.67	5.18333	193.177	5.2199	0.000670048	AGAP009593	NP_610819.1 uncharacterized protein Dmel_CG12374 [Drosophila melanogaster]
FBgn0004872	3685.67	1907.67	65.0833	31.06	-1.06723	0.000677239	piwi	ACN43727.1 FI04411p, partial [Drosophila melanogaster]
FBgn0263232	1564	760	11.23	4.99667	-1.16832	0.000680717	sbr	NP_001287064.1 nuclear export factor 3, isoform C [Drosophila melanogaster]
FBgn0033264	1791	910.667	49.7167	23.2767	-1.09485	0.0006831	Nup50	NP_610355.1 nucleoporin 50kD [Drosophila melanogaster]
FBgn0036483	682.667	293	8.40667	3.33	-1.33601	0.000683785	--	NP_648752.1 uncharacterized protein Dmel_CG12316, isoform A [Drosophila melanogaster]
FBgn0267977	261.333	114.667	5.87333	2.38	-1.30322	0.000687498	Sprtn	NP_573032.1 maternal haploid [Drosophila melanogaster]
FBgn0036668	1297.67	616.333	12.7333	5.51667	-1.20674	0.000690791	--	NP_648926.3 zinc finger CCHC-type containing 7 [Drosophila melanogaster]
FBgn0011832	4.33333	42.3333	0.27	2.45	3.18175	0.00069229	betaTry	ABK56986.1 IP02084p, partial [Drosophila melanogaster]
FBgn0034618	1753	850	18.7	8.30333	-1.17128	0.000703548	AGL	NP_726062.2 uncharacterized protein Dmel_CG9485, isoform B [Drosophila melanogaster]
FBgn0039298	18.3333	63	1.00333	2.94667	1.55428	0.00070403	to	NP_001287525.1 takeout, isoform B [Drosophila melanogaster]
FBgn0003475	880	402.333	10.8533	4.50333	-1.26907	0.000708005	spir	NP_724254.1 spire, isoform A [Drosophila melanogaster]
FBgn0021764	1470	712	8.77	3.88	-1.17652	0.000718254	-	-
FBgn0011592	798	392.667	6.74333	3.03333	-1.15256	0.000722665	NEO1	NP_523716.2 frazzled, isoform A [Drosophila melanogaster]
FBgn0037338	515.667	251.667	10.5567	4.73333	-1.15723	0.000726433	SNM1	NP_649548.1 Snm1 [Drosophila melanogaster]
FBgn0031493	1238	623.333	27.4067	12.61	-1.11996	0.000731676	SF3B2	NP_001259979.1 splicing factor 3b subunit 2, isoform B [Drosophila melanogaster]
FBgn0032051	1105.33	525	23.1233	10.15	-1.18787	0.000744233	MPHOSPH10	NP_609237.1 uncharacterized protein Dmel_CG13097 [Drosophila melanogaster]
FBgn0261786	921	429	12.67	5.44333	-1.21885	0.000745505	--	NP_611803.1 minus [Drosophila melanogaster]
FBgn0029873	560	295	16.5367	7.94667	-1.05725	0.000749165	srek1ip1	NP_572323.1 uncharacterized protein Dmel_CG3918 [Drosophila melanogaster]
FBgn0263599	2266	1053.33	18.0267	7.66	-1.23472	0.000749928	l(3)72Ab	NP_648818.3 lethal (3) 72Ab [Drosophila melanogaster]
FBgn0039896	32.6667	85	1.19667	2.75	1.20041	0.000750075	y	NP_651912.3 yellow-h [Drosophila melanogaster]
FBgn0027948	4217.33	1934.33	30.32	12.72	-1.25317	0.000750986	msps	NP_001247129.1 mini spindles, isoform D [Drosophila melanogaster]
FBgn0030504	4108	2006.67	48.2767	21.8533	-1.14347	0.000754846	CG2691	NP_001285218.1 uncharacterized protein Dmel_CG2691, isoform B [Drosophila melanogaster]
FBgn0029899	832.333	408	4.32333	1.91667	-1.17354	0.000761889	--	NP_001284962.1 small ovary, isoform C [Drosophila melanogaster]
FBgn0085474	218.667	521	23.5467	48.2167	1.03401	0.000762262	--	NP_001097420.1 uncharacterized protein Dmel_CG34445 [Drosophila melanogaster]
FBgn0039563	545.333	269.667	24.18	10.5833	-1.19202	0.000762749	CG4951	NP_001097950.1 uncharacterized protein Dmel_CG4951, isoform B [Drosophila melanogaster]
FBgn0266101	1269	615	15.3533	6.8	-1.17495	0.000763666	--	NP_001287006.1 uncharacterized protein Dmel_CG44838, isoform I [Drosophila melanogaster]
FBgn0042696	41.3333	98.6667	0.493333	1.04333	1.08057	0.000768881	NFIX	NP_995592.2 nuclear factor I, isoform B [Drosophila melanogaster]
FBgn0001222	1736.67	934.333	32.95	16.3533	-1.01069	0.00077142	Hsf	NP_001036555.1 heat shock factor, isoform D [Drosophila melanogaster]
FBgn0023513	459.667	218.667	7.18	3.11667	-1.20398	0.000779292	CG14803	NP_569950.1 uncharacterized protein Dmel_CG14803, isoform A [Drosophila melanogaster]
FBgn0029157	1576	836.333	18.13	8.71	-1.05763	0.000779312	ssh	NP_733063.1 slingshot, isoform B [Drosophila melanogaster]
FBgn0028744	2579	1300.33	54.2933	25.2067	-1.10697	0.000781587	CG5033	NP_611270.1 uncharacterized protein Dmel_CG5033 [Drosophila melanogaster]
FBgn0038683	1706	811.333	36.34	15.9967	-1.18379	0.00078796	TIMM44	AFB40594.1 FI19331p1, partial [Drosophila melanogaster]
FBgn0040294	787	361	13.1967	5.56333	-1.24615	0.000789139	SH3RF3	NP_523776.1 plenty of SH3s [Drosophila melanogaster]
FBgn0000251	1029.67	476.333	22.9833	9.79667	-1.23023	0.000797714	cad	NP_001260641.1 caudal, isoform C [Drosophila melanogaster]
FBgn0030833	603.333	288	8.64	3.75667	-1.20158	0.000804514	At2g35920	NP_001285369.1 uncharacterized protein Dmel_CG8915, isoform B [Drosophila melanogaster]
FBgn0038223	659	321.667	6.95	3.07	-1.17877	0.000807119	--	NP_001247101.1 aftiphilin, isoform C [Drosophila melanogaster]
FBgn0023531	173	74	1.62667	0.646667	-1.33082	0.000808298	CG32809	NP_001245466.1 uncharacterized protein Dmel_CG32809, isoform G [Drosophila melanogaster]
FBgn0261286	1092.67	511.333	15.3	6.56667	-1.2203	0.000808371	Mat89Ba	NP_650530.2 maternal transcript 89Ba [Drosophila melanogaster]
FBgn0033897	1379	720.333	21.1233	9.95333	-1.08559	0.000811269	Kansl3	NP_001260963.1 reduction in Cnn dots 1, isoform E [Drosophila melanogaster]
FBgn0037249	8406.67	4152.33	119.347	53.6667	-1.15306	0.000812158	eIF3a	NP_649470.2 eukaryotic translation initiation factor 3 subunit a, isoform A [Drosophila melanogaster]
FBgn0034491	896.667	491.333	13.59	6.79333	-1.00035	0.000812251	LIPE	NP_611463.1 Hormone-sensitive lipase, isoform B [Drosophila melanogaster]
FBgn0011204	1915	974.667	36.08	16.96	-1.08906	0.000820717	cue	NP_612113.2 cueball [Drosophila melanogaster]
FBgn0040099	132	329.333	6.74	14.5567	1.11086	0.000830851	-	-
FBgn0032157	1415.67	726	24.4333	11.5067	-1.08638	0.000834101	Etl1	NP_609320.2 Etl1 [Drosophila melanogaster]
FBgn0032456	2629.33	1215.67	25.48	10.8533	-1.23123	0.000838625	ABCC1	NP_723772.2 Multidrug-Resistance like protein 1, isoform A [Drosophila melanogaster]
FBgn0284251	2249	1118.67	34.0567	15.7	-1.11717	0.000846458	WDR75	NP_610086.3 lethal (2) 05287 [Drosophila melanogaster]
FBgn0014127	566.333	274	11.5933	5.14667	-1.17159	0.000849559	ncaph	NP_001286094.1 barren, isoform C [Drosophila melanogaster]
FBgn0266916	721.333	302.667	8.18333	3.17	-1.36821	0.000854992	--	NP_731254.2 centromeric protein-C, isoform A [Drosophila melanogaster]
FBgn0001180	497	196.667	8.19667	3	-1.45007	0.000858897	hb	NP_731267.1 hunchback, isoform A [Drosophila melanogaster]
FBgn0265778	1095	565.333	9.96333	4.64667	-1.10043	0.000863761	RAPGEF2	NP_609012.2 PDZ domain-containing guanine nucleotide exchange factor, isoform A [Drosophila melanogaster]
FBgn0266557	4372.33	1964.67	18.3033	7.58	-1.27184	0.000873857	Chd7	NP_001137761.1 kismet, isoform C [Drosophila melanogaster]
FBgn0030093	1516.67	825.667	30.2533	15.0767	-1.00478	0.000875242	SMARCE1	NP_572530.1 brahma associated protein 111kD [Drosophila melanogaster]
FBgn0026427	817	337.333	5.19333	2.01	-1.36947	0.000880353	--	NP_610972.2 Su(var)2-HP2, isoform A [Drosophila melanogaster]
FBgn0278604	1140	478.667	18.82	7.31667	-1.36301	0.00088238	dmt	NP_524295.1 dalmatian [Drosophila melanogaster]
FBgn0037344	1572.33	756.333	10.24	4.48333	-1.19157	0.000886345	Phrf1	NP_649554.1 uncharacterized protein Dmel_CG2926, isoform A [Drosophila melanogaster]
FBgn0031052	1061.67	482	8.45	3.53667	-1.25656	0.000887076	Elys	NP_001285454.1 elys, isoform B [Drosophila melanogaster]
FBgn0264707	472.333	220.667	6.86667	2.87667	-1.25521	0.000889513	ARHGEF4	NP_612024.4 Rho guanine nucleotide exchange factor 3, isoform L [Drosophila melanogaster]
FBgn0283478	5756.67	3107	193.177	95.5267	-1.01595	0.000891486	METAP2	NP_001260299.1 uninitiated, isoform B [Drosophila melanogaster]
FBgn0082831	1312.33	592.667	10.5067	4.29667	-1.29002	0.000897105	PHF3	NP_001247075.1 protein partner of snf, isoform B [Drosophila melanogaster]
FBgn0015805	2075.67	1075	52.02	24.68	-1.07572	0.000897332	HDAC1	XP_016926197.1 PREDICTED: histone deacetylase Rpd3, partial [Drosophila suzukii]
FBgn0027330	1356.67	694.667	22.2167	10.4367	-1.08998	0.000904157	l(1)G0020	NP_572503.1 lethal (1) G0020, isoform A [Drosophila melanogaster]
FBgn0039528	716	336.667	6.69667	2.87333	-1.22072	0.000908871	ATRNL1	NP_001263013.1 distracted, isoform C [Drosophila melanogaster]
FBgn0016131	1018	520	33.9867	15.6833	-1.11574	0.000909231	cdk4	NP_001286493.1 Cyclin-dependent kinase 4, isoform D [Drosophila melanogaster]
FBgn0034240	891.667	383	6.04667	2.33333	-1.37375	0.000916539	--	NP_001097359.1 misexpression suppressor of ras 4, isoform B [Drosophila melanogaster]
FBgn0023097	1397.33	700.333	13.7333	6.23333	-1.13961	0.000918708	Trim24	NP_001262765.1 bonus, isoform C [Drosophila melanogaster]
FBgn0026441	668.333	342	10.2067	4.69	-1.12185	0.000922655	Mllt3	NP_001262596.1 ENL/AF9-related, isoform C [Drosophila melanogaster]
FBgn0005694	1610.67	745.667	27.1967	11.1833	-1.28208	0.000928669	Aef1	NP_524200.1 adult enhancer factor 1, isoform B [Drosophila melanogaster]
FBgn0026430	3252.33	1646.33	54.1667	25.3	-1.09827	0.000930998	Grip84	NP_728264.1 Gamma-tubulin ring protein 84, isoform A [Drosophila melanogaster]
FBgn0035162	5416.67	2800.67	67.2967	31.92	-1.07607	0.000934321	Sf3b3	NP_728546.1 splicing factor 3b subunit 3, isoform A [Drosophila melanogaster]
FBgn0035025	551.333	252	12.5533	5.22333	-1.26503	0.000943667	uri	NP_611933.1 unconventional prefoldin RPB5 interactor [Drosophila melanogaster]
FBgn0086855	1058	531	24.9367	11.57	-1.10788	0.000945575	--	NP_001259812.1 uncharacterized protein Dmel_CG17078, isoform E [Drosophila melanogaster]
FBgn0015600	1219.33	566.667	10.4767	4.83	-1.11708	0.000948007	--	NP_477153.1 toucan, isoform A [Drosophila melanogaster]
FBgn0025635	596	303	14.1167	6.56	-1.10563	0.00095244	HINFP	NP_652054.1 uncharacterized protein Dmel_CG17829, isoform A [Drosophila melanogaster]
FBgn0001994	1057.67	510	15.3267	6.59667	-1.21623	0.000955886	crp	NP_001285976.1 cropped, isoform B [Drosophila melanogaster]
FBgn0034962	1668	803.333	39.4067	17.5733	-1.16505	0.0009565	MAN1	NP_001286812.1 MAN1, isoform C [Drosophila melanogaster]
FBgn0050020	960.667	520.333	10.88	5.41667	-1.0062	0.000965086	--	NP_610627.2 uncharacterized protein Dmel_CG30020, isoform A [Drosophila melanogaster]
FBgn0002638	6243.67	3384.67	146.907	73.3633	-1.00177	0.00097081	Rcc1	NP_523943.1 regulator of chromosome condensation 1, isoform A [Drosophila melanogaster]
FBgn0030710	701.333	303.333	14.2433	5.74	-1.31116	0.000974869	bab2	NP_573091.1 uncharacterized protein Dmel_CG8924 [Drosophila melanogaster]
FBgn0031606	591.667	309.333	9.4	4.52	-1.05634	0.000975647	PHF14	NP_608836.1 uncharacterized protein Dmel_CG15439 [Drosophila melanogaster]
FBgn0032701	479.667	212	13.7133	5.52	-1.31284	0.000985719	CG10341	NP_609898.1 uncharacterized protein Dmel_CG10341, isoform A [Drosophila melanogaster]
FBgn0261535	648.333	331.667	14.9133	6.97	-1.09737	0.000991489	nol10	NP_609711.1 lethal (2) 34Fd [Drosophila melanogaster]
FBgn0036896	395.333	200.667	5.18667	2.37667	-1.12587	0.000992415	Map3k12	NP_649137.3 wallenda, isoform A [Drosophila melanogaster]
FBgn0265630	924	437.333	8.12	3.55333	-1.19231	0.000992482	sno	NP_001096967.1 strawberry notch, isoform B [Drosophila melanogaster]
FBgn0015229	1087	519	28.2233	12.3533	-1.19199	0.00099596	glec	NP_524443.2 gliolectin [Drosophila melanogaster]
FBgn0030170	288	108.333	4.09667	1.43	-1.51844	0.000996922	DNA2	NP_727386.1 uncharacterized protein Dmel_CG2990, isoform B [Drosophila melanogaster]
FBgn0035229	982.333	507.333	9.51667	4.49333	-1.08267	0.00100102	Dennd5b	NP_647620.1 pinstripe, isoform A [Drosophila melanogaster]
FBgn0086707	1479.67	701.333	18.3867	8.07333	-1.18742	0.00100303	ncm	NP_609877.2 nucampholin [Drosophila melanogaster]
FBgn0041188	926	438	10.2733	4.42	-1.21679	0.00101061	Atx2	NP_732033.1 Ataxin-2, isoform B [Drosophila melanogaster]
FBgn0037379	1022.67	483.667	13.49	5.67333	-1.24962	0.00101808	ZNF800	NP_001262301.1 uncharacterized protein Dmel_CG10979, isoform B [Drosophila melanogaster]
FBgn0000581	2049.33	989	11.6333	5.11667	-1.18499	0.00101897	EPC1	NP_001260897.1 enhancer of polycomb, isoform E [Drosophila melanogaster]
FBgn0015402	594.333	295	8.57667	3.92	-1.12956	0.00101957	KSR2	NP_001287177.1 kinase suppressor of ras, isoform B [Drosophila melanogaster]
FBgn0036374	548.333	226.333	4.02333	1.47667	-1.44605	0.0010287	Supt20h	NP_001287062.1 Spt20, isoform D [Drosophila melanogaster]
FBgn0029733	1819.67	906.667	51.0133	23.64	-1.10964	0.00103228	glra1	NP_572194.1 uncharacterized protein Dmel_CG6927 [Drosophila melanogaster]
FBgn0002552	495.333	231.333	7.18667	3.08667	-1.21927	0.00103591	lin	NP_524815.1 lines [Drosophila melanogaster]
FBgn0034989	1088	575.333	14.7267	7.09	-1.05457	0.00103772	UBE3C	NP_611896.1 uncharacterized protein Dmel_CG3356 [Drosophila melanogaster]
FBgn0000463	554	263.667	5.96667	2.57333	-1.21329	0.00103868	Dl	AAR21455.1 delta protein [Drosophila melanogaster]
FBgn0037073	2603	1175	48.76	20.1633	-1.27396	0.00104173	Tsr1	NP_649304.1 Tsr1 ribosome assembly factor [Drosophila melanogaster]
FBgn0032815	1206	616.667	20.5033	9.56	-1.10078	0.00105958	--	NP_609996.2 uncharacterized protein Dmel_CG10462, isoform A [Drosophila melanogaster]
FBgn0000146	2525.67	1300.33	46.9833	22.4167	-1.06758	0.00106001	aub	NP_476734.1 aubergine, isoform A [Drosophila melanogaster]
FBgn0039055	1068.33	506.667	16.3667	7.11333	-1.20216	0.00107251	Rassf4	NP_651126.3 Ras association family member [Drosophila melanogaster]
FBgn0010825	1686	837.667	10.6767	4.8	-1.15335	0.00107282	RERE	NP_001261581.1 grunge, isoform J [Drosophila melanogaster]
FBgn0002542	2062.67	1055.33	30.5967	14.5067	-1.07666	0.00107707	lds	NP_524850.2 lodestar [Drosophila melanogaster]
FBgn0263831	200	87	4.73667	1.86333	-1.34599	0.00107967	Gen	NP_647943.2 XPG-like endonuclease [Drosophila melanogaster]
FBgn0037716	537	274.667	9.68333	4.5	-1.10558	0.00108997	Son	NP_001262426.1 Son DNA binding protein, isoform B [Drosophila melanogaster]
FBgn0024698	995.333	488.333	10.8967	4.95667	-1.13644	0.0010924	Cpsf160	NP_995833.1 cleavage and polyadenylation specificity factor 160, isoform A [Drosophila melanogaster]
FBgn0004406	576.667	282	8.3	3.74	-1.15007	0.00109566	tam	NP_476821.1 tamas [Drosophila melanogaster]
FBgn0260475	102	31.6667	3.17	0.91	-1.80054	0.00110112	Gns	AAO39590.1 LD10990p, partial [Drosophila melanogaster]
FBgn0284253	3027	1475.33	41.8233	18.8533	-1.14949	0.00110355	Lars1	NP_001285589.1 Leucyl-tRNA synthetase, isoform B [Drosophila melanogaster]
FBgn0015818	542	278.333	17.63	8.26	-1.09382	0.00110405	SF3B4	NP_511058.1 spliceosomal protein on the X [Drosophila melanogaster]
FBgn0000810	910.333	453	15.86	7.24	-1.13133	0.00110673	fs(1)K10	NP_477491.1 female sterile (1) K10 [Drosophila melanogaster]
FBgn0033155	1459.67	773.667	14.7167	7.16	-1.03942	0.00110732	Brpf1	NP_001286155.1 Bromodomain-containing protein, 140kD, isoform B [Drosophila melanogaster]
FBgn0031390	1263.33	657.667	12.4933	5.93667	-1.07343	0.00111227	THOC2	NP_608646.3 tho2, isoform B [Drosophila melanogaster]
FBgn0002431	2988.67	1389	17.7167	7.47	-1.24593	0.00111714	hyd	NP_001287262.1 hyperplastic discs, isoform B [Drosophila melanogaster]
FBgn0034087	3218.67	1424.33	28.9233	11.7933	-1.29426	0.00112144	clu	NP_611095.1 clueless, isoform A [Drosophila melanogaster]
FBgn0039385	485.333	239	16.8367	7.59667	-1.14817	0.00112464	FAM98A	NP_651439.2 uncharacterized protein Dmel_CG5913 [Drosophila melanogaster]
FBgn0051224	1042	487.333	8.27333	3.53333	-1.22744	0.00113478	--	NP_001287396.1 uncharacterized protein Dmel_CG31224, isoform B [Drosophila melanogaster]
FBgn0035060	1386.67	754	16.91	8.44333	-1.00199	0.0011364	EPS15L1	NP_611965.2 epidermal growth factor receptor pathway substrate clone 15, isoform A [Drosophila melanogaster]
FBgn0037894	2810.67	1413	45.6467	21.22	-1.10508	0.00113793	IPO9	NP_001287284.1 Ranbp9, isoform D [Drosophila melanogaster]
FBgn0284245	210497	113034	5525.82	2712.7	-1.02646	0.0011556	eEF1alpha1	NP_001286321.1 eukaryotic translation elongation factor 1 alpha 1, isoform D [Drosophila melanogaster]
FBgn0016075	4466.33	2348.33	37.8033	17.9733	-1.07266	0.00116055	vkg	NP_001260071.1 viking, isoform B [Drosophila melanogaster]
FBgn0025626	767.333	400	15.34	7.32333	-1.06673	0.00116203	--	NP_569973.1 uncharacterized protein Dmel_CG4281 [Drosophila melanogaster]
FBgn0261617	1241.33	576.667	5.09333	2.03	-1.32713	0.00116722	CREBBP	NP_001188575.1 nejire, isoform C [Drosophila melanogaster]
FBgn0028360	1217.67	571.333	20.82	8.99667	-1.21051	0.0011718	CDC7	NP_727103.1 Cdc7 kinase, isoform A [Drosophila melanogaster]
FBgn0051151	1290.33	653.667	11.3167	5.20333	-1.12094	0.00117851	wge	NP_732790.3 winged eye, isoform D [Drosophila melanogaster]
FBgn0004924	4011.33	1859.67	61.4633	25.69	-1.25852	0.0011894	Top1	P30189.1 RecName: Full=DNA topoisomerase 1; AltName: Full=DNA topoisomerase I [Drosophila melanogaster]
FBgn0040066	891.667	487.333	28.1833	13.8833	-1.02149	0.00119016	wds	NP_001245503.1 will die slowly, isoform B [Drosophila melanogaster]
FBgn0032929	1007.33	468	18.76	8.08333	-1.21464	0.00119228	Mcm10	NP_610097.2 minichromosome maintenance 10 [Drosophila melanogaster]
FBgn0037021	1349.33	615	16.9467	7.05667	-1.26394	0.00120082	Pcif1	NP_649254.2 uncharacterized protein Dmel_CG11399 [Drosophila melanogaster]
FBgn0026149	632.667	344	20.1933	10.0667	-1.00429	0.00120295	Bcl7b	NP_572562.1 BCL7-like [Drosophila melanogaster]
FBgn0039117	758.667	401.667	10.1433	4.94333	-1.03698	0.00120712	SKIV2L	NP_001262884.1 twister, isoform B [Drosophila melanogaster]
FBgn0034628	495	263.333	10.7567	5.17	-1.05699	0.0012098	CG5009	NP_001286677.1 acyl-Coenzyme A oxidase at 57D proximal, isoform B [Drosophila melanogaster]
FBgn0259216	89.6667	224.667	1.11	2.36	1.08823	0.00121146	ARHGAP6	NP_001245416.1 Rho GTPase activating protein at 102A, isoform D [Drosophila melanogaster]
FBgn0030894	718	375.667	18.1033	8.62	-1.0705	0.00121214	--	NP_001245731.1 multivesicular body subunit 12, isoform D [Drosophila melanogaster]
FBgn0264449	382.667	164.333	2.86667	1.13667	-1.33456	0.00121405	CG43867	NP_001284762.1 uncharacterized protein Dmel_CG43867, isoform K [Drosophila melanogaster]
FBgn0005624	294	119.333	2.65333	0.973333	-1.4468	0.00121566	Psc	NP_001286368.1 posterior sex combs, isoform B [Drosophila melanogaster]
FBgn0033236	1538.67	786.667	30.0467	14.23	-1.07827	0.00122777	--	NP_001286173.1 uncharacterized protein Dmel_CG14764, isoform C [Drosophila melanogaster]
FBgn0038269	698.667	317.333	11.5667	4.88	-1.24502	0.0012315	Exosc10	NP_001097795.1 Rrp6, isoform B [Drosophila melanogaster]
FBgn0263046	118.667	273.667	6.38667	12.8333	1.00676	0.00123229	--	NP_001246190.1 uncharacterized protein Dmel_CG43341 [Drosophila melanogaster]
FBgn0027296	351.333	167.667	8.66333	3.78	-1.19654	0.00123861	ptar1	NP_001284818.1 tempura, isoform B [Drosophila melanogaster]
FBgn0033482	2350.33	1198	32.0933	15.0867	-1.089	0.00124209	NOMO2	NP_610551.1 uncharacterized protein Dmel_CG1371 [Drosophila melanogaster]
FBgn0027503	573.333	280.333	5.65667	2.52667	-1.16272	0.00125604	NFRKB	NP_001287243.1 uncharacterized protein Dmel_CG11970, isoform B [Drosophila melanogaster]
FBgn0037010	1133.67	543.333	31.4167	13.7833	-1.18861	0.00125716	PTDSS1	NP_649242.1 uncharacterized protein Dmel_CG4825, isoform A [Drosophila melanogaster]
FBgn0053181	550	267.667	10.48	4.69333	-1.15895	0.001266	Slc41a2	NP_001096908.1 uncharacterized protein Dmel_CG33181, isoform C [Drosophila melanogaster]
FBgn0026361	229.333	115.667	7.17	3.29	-1.12389	0.00126603	2022-09-02	NP_651961.1 septin 5, isoform B [Drosophila melanogaster]
FBgn0011474	939.667	469.333	14.4667	6.50667	-1.15274	0.00126671	PR-Set7	NP_001247100.1 PR/SET domain containing protein 7, isoform D [Drosophila melanogaster]
FBgn0032123	688.667	340.333	6.69333	3.02333	-1.14658	0.00127066	SLCO5A1	NP_609293.2 organic anion transporting polypeptide 30B, isoform B [Drosophila melanogaster]
FBgn0036493	897.333	494.333	19.4867	9.44	-1.04563	0.00127146	Slc7a2	NP_001034016.1 uncharacterized protein Dmel_CG7255, isoform F [Drosophila melanogaster]
FBgn0028581	261.667	109.333	2.75667	1.06333	-1.37433	0.00127592	--	NP_001027069.3 mei-217 [Drosophila melanogaster]
FBgn0013772	121.333	293.667	3.87	8.03667	1.05426	0.00127995	Cyp6a8	AEX93131.1 FI17852p1, partial [Drosophila melanogaster]
FBgn0030680	539.333	232	6.52333	2.6	-1.3271	0.00128204	--	NP_573065.1 uncharacterized protein Dmel_CG8944 [Drosophila melanogaster]
FBgn0033027	55.3333	156.667	3.98667	9.72	1.28577	0.00128759	TpnC41C	NP_001163055.1 troponin C isoform 4, isoform B [Drosophila melanogaster]
FBgn0037760	1349.67	728	14.3967	6.83333	-1.07507	0.00129051	FBXO11	NP_001262441.1 F-box protein 11, isoform B [Drosophila melanogaster]
FBgn0010300	2131.33	1021	21.37	9.18333	-1.2185	0.00130428	brat	NP_001188842.2 brain tumor, isoform E [Drosophila melanogaster]
FBgn0260959	818.667	398	14.2633	6.31667	-1.17508	0.00130444	MCPH1	NP_001163123.1 microcephalin, isoform D [Drosophila melanogaster]
FBgn0034098	1150.67	556.333	23.6333	10.6267	-1.15313	0.00132217	--	NP_611103.2 krimper [Drosophila melanogaster]
FBgn0019990	1051	541.667	10.3333	4.76333	-1.11726	0.00132385	Eif2ak4	NP_001263142.1 Gcn2, isoform C [Drosophila melanogaster]
FBgn0033186	213.667	99.3333	6.00667	2.54333	-1.23984	0.00132433	--	NP_610291.2 uncharacterized protein Dmel_CG1602 [Drosophila melanogaster]
FBgn0011785	1376.67	630.333	10.1933	4.25	-1.26209	0.00132914	Brwd3	NP_732982.1 BRWD3 [Drosophila melanogaster]
FBgn0026259	4790	2561	62.0267	30.4133	-1.02818	0.0013428	EIF5B	NP_001246599.1 eukaryotic translation initiation factor 5B, isoform C [Drosophila melanogaster]
FBgn0259876	991	475	11.9233	5.28333	-1.17427	0.00135508	NCAPG	NP_995827.2 chromosome associated protein G, isoform F [Drosophila melanogaster]
FBgn0024182	534.333	245	5.22667	2.19333	-1.25277	0.00136211	waw	AHV85501.1 AT19052p1, partial [Drosophila melanogaster]
FBgn0004795	1339	640.333	16.3633	7.31	-1.16252	0.00136527	retn	NP_788434.1 retained, isoform B [Drosophila melanogaster]
FBgn0017561	1585.33	837	20.6933	10.09	-1.03624	0.00136693	Ork1	NP_001285097.1 open rectifier K[+] channel 1, isoform C [Drosophila melanogaster]
FBgn0021796	897	424.667	6.01	2.59667	-1.2107	0.0013686	Tor	NP_001260427.1 target of rapamycin, isoform B [Drosophila melanogaster]
FBgn0030018	1012	477.333	10.4267	4.49	-1.21549	0.00136893	slpr	NP_001188558.1 slipper, isoform B [Drosophila melanogaster]
FBgn0003415	1502	633.667	7.60667	2.91333	-1.38459	0.00136929	skd	NP_730591.2 skuld, isoform E [Drosophila melanogaster]
FBgn0262582	1447	802	11.0667	5.20333	-1.08871	0.00137548	cic	NP_001262755.1 capicua, isoform G [Drosophila melanogaster]
FBgn0004698	2153.33	1075.67	28.8467	13.2667	-1.1206	0.00137593	Xpc	NP_725451.1 xeroderma pigmentosum, complementation group C, isoform C [Drosophila melanogaster]
FBgn0263005	390.667	172.333	4.81333	1.96	-1.29618	0.00137638	CHPF	NP_001285184.1 uncharacterized protein Dmel_CG43313, isoform B [Drosophila melanogaster]
FBgn0037360	2040.33	1104.67	45.2967	22.31	-1.02171	0.00137999	CG2182	NP_649570.1 uncharacterized protein Dmel_CG2182 [Drosophila melanogaster]
FBgn0263933	1785.33	922.333	28.33	13.5033	-1.06902	0.00138517	ebi	NP_477329.1 ebi [Drosophila melanogaster]
FBgn0027603	1477.67	697	14.3633	6.19	-1.21438	0.00138735	SENP1	NP_573362.1 Ulp1 [Drosophila melanogaster]
FBgn0263048	154.333	67	1.94667	0.78	-1.31946	0.00139085	Gpdh	NP_732726.2 Glycerol-3-phosphate dehydrogenase 3, isoform A [Drosophila melanogaster]
FBgn0037831	377	181.333	5.06	2.20667	-1.19727	0.0014083	--	NP_650014.2 chromosome associated protein H2, isoform E [Drosophila melanogaster]
FBgn0030246	1268.67	690	16.3333	8.04333	-1.02195	0.00140928	DHX57	NP_001285098.1 uncharacterized protein Dmel_CG1582, isoform B [Drosophila melanogaster]
FBgn0033062	1959.67	1023.67	32.22	15.3767	-1.06721	0.00141495	Ars2	NP_610203.2 arsenic resistance protein 2, isoform A [Drosophila melanogaster]
FBgn0015376	499	240.333	8.18333	3.62	-1.1767	0.0014153	CHTF18	NP_787969.1 cutlet [Drosophila melanogaster]
FBgn0016034	1457.33	761.667	41.9667	20.2733	-1.04966	0.0014191	mael	ADX35971.1 AT21095p, partial [Drosophila melanogaster]
FBgn0035036	378.333	195	8.93	4.22667	-1.07914	0.00142019	--	NP_611944.1 uncharacterized protein Dmel_CG4707 [Drosophila melanogaster]
FBgn0003278	1370	672.667	20.3733	9.2	-1.14698	0.00142267	RpI135	NP_476708.1 RNA polymerase I 135kD subunit [Drosophila melanogaster]
FBgn0250786	2414.67	1213.33	20.2633	9.29667	-1.12409	0.00142843	Chd1	NP_477197.1 Chromodomain-helicase-DNA-binding protein 1, isoform A [Drosophila melanogaster]
FBgn0034942	3	20.3333	0.173333	1.08	2.63941	0.00143313	--	ADF97846.1 RT08035p, partial [Drosophila melanogaster]
FBgn0025186	593.667	304	10.5667	4.92667	-1.10084	0.00144624	ari-2	NP_477374.1 ariadne 2 [Drosophila melanogaster]
FBgn0035016	1654.67	805.333	25.9533	10.96	-1.24367	0.00144945	pAbp	NP_001246493.1 uncharacterized protein Dmel_CG4612, isoform C [Drosophila melanogaster]
FBgn0037580	4873	2596	105.467	51.7833	-1.02623	0.00145809	DppIII	NP_731237.1 dipeptidyl aminopeptidase III, isoform C [Drosophila melanogaster]
FBgn0032521	495.667	255	8.84667	4.21	-1.07131	0.00145979	--	NP_001285899.1 uncharacterized protein Dmel_CG7110, isoform C [Drosophila melanogaster]
FBgn0038344	624.333	257.333	4.77	1.8	-1.40599	0.00146277	ascc3	NP_650472.2 obelus [Drosophila melanogaster]
FBgn0020261	1241.33	624.667	12.48	5.74667	-1.11882	0.00146387	XRN1	NP_001162796.1 pacman, isoform B [Drosophila melanogaster]
FBgn0001986	1527	799.667	22.4867	10.8733	-1.04828	0.00146569	Mtrex	NP_524929.1 Mtr4 helicase [Drosophila melanogaster]
FBgn0030466	485.667	242.667	4.12333	1.89	-1.12542	0.00147172	--	NP_572870.2 uncharacterized protein Dmel_CG15744 [Drosophila melanogaster]
FBgn0000158	223.667	108.667	6.3	2.8	-1.16993	0.0014818	bam	NP_476800.1 bag of marbles [Drosophila melanogaster]
FBgn0039972	6065.67	2869.67	73.11	32.24	-1.18122	0.00148319	MARF1	NP_001246133.1 meiosis regulator and mRNA stability factor 1, isoform F [Drosophila melanogaster]
FBgn0034964	881.333	379.333	7.40667	2.89	-1.35775	0.00148798	IntS1	NP_611875.1 integrator 1 [Drosophila melanogaster]
FBgn0266369	855.667	455.333	15.47	7.57	-1.03111	0.00149005	--	NP_610075.2 microsomal triacylglycerol transfer protein [Drosophila melanogaster]
FBgn0001330	807	399.667	11.38	5.16667	-1.13919	0.00149293	kz	NP_001284815.1 kurz, isoform B [Drosophila melanogaster]
FBgn0000289	2544.33	1370	35.9967	17.2067	-1.0649	0.00149923	--	NP_001097306.2 combgap, isoform L [Drosophila melanogaster]
FBgn0002441	733.333	357	7.22333	3.22333	-1.16411	0.00150375	L3MBTL3	NP_733209.1 lethal (3) malignant brain tumor [Drosophila melanogaster]
FBgn0034300	410	178.333	4.47	1.77333	-1.33381	0.00152384	CG5098	NP_001097363.1 uncharacterized protein Dmel_CG5098, isoform B [Drosophila melanogaster]
FBgn0028476	1468.67	756.333	15.8667	7.58	-1.06573	0.00153956	USP1	NP_001263061.1 ubiquitin specific protease 1, isoform E [Drosophila melanogaster]
FBgn0032481	342.333	147	3.10333	1.22	-1.34694	0.00153962	--	NP_609612.2 uncharacterized protein Dmel_CG16972 [Drosophila melanogaster]
FBgn0032454	1572.33	844	24.2667	11.8267	-1.03693	0.00154799	--	NP_001260422.1 uncharacterized protein Dmel_CG5787, isoform B [Drosophila melanogaster]
FBgn0040319	964	512	11.5667	5.60667	-1.04476	0.00155281	Gclc	NP_001285001.1 Glutamate-cysteine ligase catalytic subunit, isoform C [Drosophila melanogaster]
FBgn0043456	2619	1373.33	50.44	24.2533	-1.05639	0.00155983	Ndf	NP_001188767.1 Nucleosome-destabilizing factor, isoform B [Drosophila melanogaster]
FBgn0004860	287	139	2.58667	1.14667	-1.17365	0.00156671	ph-p	NP_524794.2 polyhomeotic distal, isoform A [Drosophila melanogaster]
FBgn0030354	1825.33	968.333	19.0533	9.26	-1.04096	0.00156937	Upf1	NP_001285145.1 Upf1, isoform B [Drosophila melanogaster]
FBgn0000405	28303.3	13503.3	559.053	250.16	-1.16013	0.00157644	CycB	NP_726244.1 cyclin B, isoform A [Drosophila melanogaster]
FBgn0026375	1262.33	628.667	10.7633	4.81	-1.16202	0.00157728	RhoGAPp190	NP_001259658.1 Rho GTPase activating protein p190, isoform F [Drosophila melanogaster]
FBgn0035026	630	323.333	10.31	4.83	-1.09395	0.00158037	CTDP1	NP_001286846.1 TFIIF-interacting CTD phosphatase, isoform B [Drosophila melanogaster]
FBgn0036004	1414.33	624.333	8.93667	3.60333	-1.3104	0.00158797	JARID2	NP_648324.1 Jumonji, AT rich interactive domain 2 [Drosophila melanogaster]
FBgn0260771	493.667	245.333	12.72	5.83667	-1.12388	0.00160648	larp7	NP_524795.2 La related protein 7 [Drosophila melanogaster]
FBgn0033904	62.3333	147.333	3.53	7.18333	1.02499	0.0016122	slc25a35	NP_001260966.1 uncharacterized protein Dmel_CG18327, isoform B [Drosophila melanogaster]
FBgn0083969	928.667	462.333	11.7	5.36667	-1.12441	0.00162767	WDR44	NP_001036772.2 uncharacterized protein Dmel_CG34133, isoform C [Drosophila melanogaster]
FBgn0039623	596.333	284.333	9.91333	4.30333	-1.20392	0.00163156	SCYL2	NP_651655.1 uncharacterized protein Dmel_CG1951 [Drosophila melanogaster]
FBgn0031070	257.333	123.333	4.70333	2.05667	-1.19338	0.00163273	--	NP_001259735.1 uncharacterized protein Dmel_CG12702, isoform B [Drosophila melanogaster]
FBgn0034728	850.667	431.667	11.1733	5.17333	-1.11089	0.00163488	rad50	AAO39559.1 LP09268p, partial [Drosophila melanogaster]
FBgn0259735	1072.33	581.333	9.11667	4.36	-1.06418	0.00164525	FNDC3A	NP_001137829.1 miles to go, isoform E [Drosophila melanogaster]
FBgn0035997	1025	552	16.14	7.95333	-1.02101	0.00165425	pho	NP_001287005.1 pleiohomeotic like, isoform B [Drosophila melanogaster]
FBgn0033636	909	404.667	5.49	1.98667	-1.46646	0.00166194	BAZ2B	NP_001097270.1 toutatis, isoform E [Drosophila melanogaster]
FBgn0034722	1020.33	555.667	19.63	9.53	-1.04251	0.00167579	Rtf1	NP_001286717.1 Rtf1, isoform B [Drosophila melanogaster]
FBgn0262619	908.667	445	20.15	9.09	-1.14843	0.00168474	DNAlig1	NP_611843.2 DNA ligase 1 [Drosophila melanogaster]
FBgn0003520	1304	629.333	14.0733	6.34333	-1.14965	0.00168548	stau	NP_476751.1 staufen, isoform A [Drosophila melanogaster]
FBgn0261954	1863.33	915.333	12.0233	5.33	-1.17363	0.00170148	--	NP_001245484.1 enhanced adult sensory threshold, isoform E [Drosophila melanogaster]
FBgn0004889	3438.33	1735.67	69.9333	31.6333	-1.14453	0.00170608	tws	NP_001287269.1 twins, isoform I [Drosophila melanogaster]
FBgn0020908	30.3333	81.6667	1.68	4.01333	1.25634	0.00170839	--	NP_001015389.1 sarcoplasmic calcium-binding protein 1, isoform A [Drosophila melanogaster]
FBgn0039067	270.333	135.333	5.25333	2.40333	-1.1282	0.00172072	--	NP_651136.1 will decrease acetylation [Drosophila melanogaster]
FBgn0011236	813	377.667	14.02	6	-1.22445	0.00172521	ken	NP_523833.1 ken and barbie [Drosophila melanogaster]
FBgn0015396	1081.33	530.333	14.7333	6.69667	-1.13757	0.00172605	foxn4	NP_524302.1 jumeau [Drosophila melanogaster]
FBgn0035969	1594	787.667	34.7533	15.9867	-1.12028	0.00172754	NAAT1	NP_648293.1 uncharacterized protein Dmel_CG4476 [Drosophila melanogaster]
FBgn0034351	357.667	172.667	13.1	5.79333	-1.1771	0.00173225	trmt10c	NP_611335.1 roswell [Drosophila melanogaster]
FBgn0037248	4765.67	2394.67	56.63	26.39	-1.10158	0.00175657	Pprc1	NP_649469.2 spargel, isoform E [Drosophila melanogaster]
FBgn0042137	2.66667	19	0.15	0.963333	2.68307	0.00176833	ADH1	NP_652673.2 uncharacterized protein Dmel_CG18814 [Drosophila melanogaster]
FBgn0022153	1072.33	535.667	11.8167	5.38333	-1.13425	0.00177	TMEM94	NP_722974.1 lethal (2) k05819, isoform A [Drosophila melanogaster]
FBgn0260794	3474.67	1586.33	19.4633	8.00333	-1.28209	0.00177233	trip12	NP_001189170.1 circadian trip, isoform B [Drosophila melanogaster]
FBgn0030692	1645	834	46.4067	21.67	-1.09863	0.00180681	MRPS30	NP_001285297.1 mitochondrial ribosomal protein S30, isoform B [Drosophila melanogaster]
FBgn0039877	1172.67	621	25.39	12.25	-1.05148	0.00181189	Mccc1	NP_001247391.1 Methylcrotonoyl-CoA carboxylase 1, isoform C [Drosophila melanogaster]
FBgn0283451	400.667	209	3.63333	1.72333	-1.07609	0.00181486	br	NP_001138144.1 broad, isoform H [Drosophila melanogaster]
FBgn0033258	318.333	158	11.1167	5.14	-1.11288	0.00182099	--	NP_610350.2 uncharacterized protein Dmel_CG8712, isoform A [Drosophila melanogaster]
FBgn0261524	1211.67	594.667	32.9433	14.85	-1.14952	0.00182254	Map2k3	NP_477162.1 licorne [Drosophila melanogaster]
FBgn0036239	1427.33	775.667	44.5433	22.1567	-1.00747	0.00182431	CNOT7	NP_001287041.1 Pop2, isoform E [Drosophila melanogaster]
FBgn0037717	455	232	7.77667	3.65333	-1.08994	0.00183706	--	NP_649915.1 uncharacterized protein Dmel_CG8301 [Drosophila melanogaster]
FBgn0037606	535.333	281.333	11.87	5.74	-1.0482	0.00185366	Smox	NP_001262380.1 uncharacterized protein Dmel_CG8032, isoform B [Drosophila melanogaster]
FBgn0037944	363	178.333	4.30333	1.87	-1.20242	0.00185617	RNF111	NP_001262484.1 uncharacterized protein Dmel_CG6923, isoform D [Drosophila melanogaster]
FBgn0039589	593.333	295.333	14.32	6.59667	-1.11822	0.00189163	C12orf4	NP_651623.1 uncharacterized protein Dmel_CG9986 [Drosophila melanogaster]
FBgn0028953	1042.67	473.333	14.6533	6.06667	-1.27225	0.00189578	tc3a	NP_001286529.1 uncharacterized protein Dmel_CG14478, isoform C [Drosophila melanogaster]
FBgn0011660	551	273.667	9.53667	4.38667	-1.12036	0.00190054	PMS2	NP_477023.1 Pms2 [Drosophila melanogaster]
FBgn0036763	399.667	209	8.92	4.32667	-1.04379	0.00190128	WARS2	NP_001262001.1 Tryptophanyl-tRNA synthetase, mitochondrial, isoform B [Drosophila melanogaster]
FBgn0034498	697	306.667	7.12	2.89333	-1.29914	0.00193474	CG16868	NP_611469.1 uncharacterized protein Dmel_CG16868 [Drosophila melanogaster]
FBgn0026597	1143	582	13.6167	6.37	-1.09601	0.00195069	Axn	NP_733336.1 axin, isoform A [Drosophila melanogaster]
FBgn0024329	1608	838.333	16.2067	7.74333	-1.06556	0.00196905	Map3k4	NP_732373.1 Mekk1, isoform B [Drosophila melanogaster]
FBgn0035121	11065.7	5654	180.95	84.6067	-1.09675	0.00198372	Tudor-SN	NP_001261195.1 tudor staphylococcal nuclease, isoform B [Drosophila melanogaster]
FBgn0027518	489.667	259	9.60667	4.67333	-1.03958	0.00198887	Wdr24	NP_733303.2 WD repeat domain 24, isoform C [Drosophila melanogaster]
FBgn0034976	497.333	232.667	4.29333	1.85333	-1.21198	0.00200095	Rad54l2	NP_611885.3 uncharacterized protein Dmel_CG4049 [Drosophila melanogaster]
FBgn0031091	486.667	227.333	11.4267	4.98	-1.19819	0.00200498	G2e3	NP_001259740.1 PHD finger protein 7, isoform B [Drosophila melanogaster]
FBgn0050285	79	184.333	7.72333	15.6367	1.01764	0.00201136	IMPPP	ADB91407.1 FI14002p, partial [Drosophila melanogaster]
FBgn0035812	744.667	366.333	8.04667	3.16667	-1.34543	0.00202638	CG7457	NP_001303376.1 uncharacterized protein Dmel_CG7457, isoform B [Drosophila melanogaster]
FBgn0036900	689.667	368.667	11.8333	5.83667	-1.01964	0.0020296	--	NP_649141.1 uncharacterized protein Dmel_CG8765, isoform A [Drosophila melanogaster]
FBgn0036812	355	186	11.4933	5.52333	-1.05719	0.00203668	Nufip1	NP_649058.1 nufip [Drosophila melanogaster]
FBgn0053182	357	168.333	6.01667	2.51667	-1.25745	0.00205424	Kdm4B	NP_001260942.1 lysine (K)-specific demethylase 4B, isoform E [Drosophila melanogaster]
FBgn0031590	1837.67	978.667	43.31	21.1933	-1.03109	0.00205991	CLPTM1	NP_001260017.1 uncharacterized protein Dmel_CG3702, isoform B [Drosophila melanogaster]
FBgn0000588	498.667	256	15.41	7.31333	-1.07527	0.00206053	esc	NP_477431.1 extra sexcombs [Drosophila melanogaster]
FBgn0263605	1341.33	710	30.5533	14.95	-1.03118	0.00206521	Utp4	NP_001261930.1 lethal (3) 72Dn, isoform B [Drosophila melanogaster]
FBgn0034313	1577.67	840.667	23.87	11.74	-1.02377	0.00207108	--	NP_611304.1 uncharacterized protein Dmel_CG5726 [Drosophila melanogaster]
FBgn0031759	1579.33	796.667	12.86	5.84	-1.13885	0.00209213	lid	NP_001245908.1 little imaginal discs, isoform C [Drosophila melanogaster]
FBgn0039186	1565	848.333	31.53	15.37	-1.03661	0.00210491	--	NP_001138106.1 uncharacterized protein Dmel_CG5746, isoform C [Drosophila melanogaster]
FBgn0030998	37.3333	81.6667	0.88	1.81	1.04041	0.00212232	--	NP_001285430.1 uncharacterized protein Dmel_CG14195, isoform B [Drosophila melanogaster]
FBgn0039663	126	50.6667	1.99333	0.706667	-1.49608	0.00218225	--	NP_001263068.1 uncharacterized protein Dmel_CG2321, isoform B [Drosophila melanogaster]
FBgn0022960	742.333	402.333	11.3167	5.65667	-1.00043	0.00218408	rap1gds1-b	NP_995767.1 visceral mesodermal armadillo-repeats, isoform C [Drosophila melanogaster]
FBgn0035689	215	102.667	2.87333	1.23333	-1.22016	0.00219026	SHPRH	NP_001261471.1 uncharacterized protein Dmel_CG7376, isoform B [Drosophila melanogaster]
FBgn0039861	545.333	281.333	10.21	4.96667	-1.03963	0.00220713	Dgcr8	NP_001263150.1 partner of drosha, isoform C [Drosophila melanogaster]
FBgn0030344	1133	578.667	14.78	6.96	-1.08649	0.00221475	Nrdc	NP_572757.2 nardilysin [Drosophila melanogaster]
FBgn0038279	118	44	1.83667	0.646667	-1.506	0.00221899	Igf1r	NP_001287331.1 secreted decoy of InR, isoform B [Drosophila melanogaster]
FBgn0037205	623.667	321	9.29667	4.39333	-1.0814	0.00221976	BoYb	NP_649430.1 brother of Yb [Drosophila melanogaster]
FBgn0037098	1089.67	534	7.28333	3.22333	-1.17605	0.00222186	WNK3	NP_001262171.2 Wnk kinase, isoform M [Drosophila melanogaster]
FBgn0002891	352	151.333	2.75667	1.09333	-1.33419	0.00222705	DNApol-zeta	NP_524881.2 mutagen-sensitive 205 [Drosophila melanogaster]
FBgn0032717	955	517.667	9.75667	4.84667	-1.0094	0.00225663	RSBN1L	NP_001137839.1 uncharacterized protein Dmel_CG10600, isoform B [Drosophila melanogaster]
FBgn0028387	582.667	291	10.8967	5.00667	-1.12196	0.00226158	KAT7	NP_001260192.1 chameau, isoform C [Drosophila melanogaster]
FBgn0263110	593.667	275	3.26333	1.36	-1.26274	0.00227044	NBEAL1	NP_001189048.2 uncharacterized protein Dmel_CG43367, isoform C [Drosophila melanogaster]
FBgn0005695	2485	1220	52.82	24.1167	-1.13105	0.00227983	gcl	NP_724708.1 germ cell-less, isoform A [Drosophila melanogaster]
FBgn0052251	846.333	390.333	9.51	4.09	-1.21734	0.00230696	Claspin	NP_001286934.1 claspin, isoform B [Drosophila melanogaster]
FBgn0034346	666.667	340.333	9.83667	4.61667	-1.09132	0.0023174	PIGO	NP_611332.1 phosphatidylinositol glycan anchor biosynthesis class O [Drosophila melanogaster]
FBgn0032363	1404.33	691.667	10.73	4.78	-1.16657	0.00233029	DLG5	NP_609505.1 discs large 5, isoform B [Drosophila melanogaster]
FBgn0010488	8668	4337	82.68	37.6567	-1.13463	0.00233491	EIF4G2	BAD83642.1 hypothetical protein, partial [Drosophila melanogaster]
FBgn0015371	1169	611.333	11.9933	5.83667	-1.03902	0.00234354	chn	NP_001246331.1 charlatan, isoform F [Drosophila melanogaster]
FBgn0027835	10952.3	5647	107.11	50.6767	-1.0797	0.00234929	HDLBP	NP_001286573.1 Dodeca-satellite-binding protein 1, isoform H [Drosophila melanogaster]
FBgn0034187	935	443.667	14.29	6.33333	-1.17397	0.00234948	mov10b.2	AAM50264.1 LD34829p [Drosophila melanogaster]
FBgn0032934	321.667	146.333	6.72333	2.81	-1.25861	0.00238754	Ankle1	NP_610099.1 uncharacterized protein Dmel_CG8679 [Drosophila melanogaster]
FBgn0036772	926.667	440.333	16.5233	7.35333	-1.16803	0.00238865	SPAC19B12.01	NP_649026.1 uncharacterized protein Dmel_CG5290 [Drosophila melanogaster]
FBgn0039633	669	297	2.99667	1.20333	-1.31632	0.00241124	--	NP_001263053.1 uncharacterized protein Dmel_CG11873, isoform D [Drosophila melanogaster]
FBgn0052654	1590.33	788.667	11.21	5.13333	-1.12682	0.00242982	SEC16B	NP_001285158.1 secretory 16, isoform I [Drosophila melanogaster]
FBgn0027499	932.667	454	10.3567	4.62667	-1.16251	0.00243454	--	NP_001286294.1 windei, isoform B [Drosophila melanogaster]
FBgn0261641	876	421.667	12.08	5.22667	-1.20866	0.00244037	Tcerg1	NP_001189184.1 uncharacterized protein Dmel_CG42724, isoform C [Drosophila melanogaster]
FBgn0028916	888.667	475	13.5667	6.71	-1.01568	0.00244178	CG33090	NP_788055.2 uncharacterized protein Dmel_CG33090, isoform B [Drosophila melanogaster]
FBgn0250907	141	62	1.05667	0.42	-1.33106	0.00246427	Cht10	NP_001036422.1 chitinase 10, isoform A [Drosophila melanogaster]
FBgn0040823	331.333	148.333	4.65	1.89333	-1.2963	0.00247502	--	NP_001287018.1 defective proboscis extension response 6, isoform F [Drosophila melanogaster]
FBgn0085353	4.66667	25.3333	0.253333	1.19333	2.23589	0.00247683	--	NP_001096972.1 uncharacterized protein Dmel_CG34324 [Drosophila melanogaster]
FBgn0020236	3493.67	1851	48.2367	23.24	-1.05352	0.00248179	Acly	NP_001137674.2 ATP citrate lyase, isoform E [Drosophila melanogaster]
FBgn0034802	12216.3	6543.67	265.49	131.78	-1.01053	0.0024887	CG3800	XP_016947524.1 PREDICTED: CCHC-type zinc finger protein CG3800 [Drosophila biarmipes]
FBgn0265574	866.333	470.667	14.3433	7.12333	-1.00976	0.00249073	CDC5L	NP_001163313.1 cell division cycle 5, isoform B [Drosophila melanogaster]
FBgn0024909	330.333	154.333	10.98	4.82667	-1.18578	0.00249115	Taf7	NP_649748.1 TBP-associated factor 7, isoform A [Drosophila melanogaster]
FBgn0004507	5689.33	3023.67	101.753	49.2733	-1.0462	0.00249143	GlyP	NP_001027219.1 glycogen phosphorylase, isoform B [Drosophila melanogaster]
FBgn0038478	1306	634.333	18.9667	8.58333	-1.14386	0.00249573	--	NP_650597.2 chromosome alignment defect 1 [Drosophila melanogaster]
FBgn0036480	261	113.667	4	1.61667	-1.30698	0.00251115	--	NP_001189108.1 centrosomal protein 135kDa, isoform B [Drosophila melanogaster]
FBgn0031452	342.333	163.333	10.5533	4.60333	-1.19695	0.0025321	CWC25	NP_608705.1 Cwc25 [Drosophila melanogaster]
FBgn0012058	1172.33	604.333	17.15	8.12	-1.07866	0.00254118	CDC27	NP_001261503.1 cell division cycle 27, isoform B [Drosophila melanogaster]
FBgn0033379	1129.67	556	25.19	11.3667	-1.14804	0.00254228	Mys45A	NP_610455.1 mystery 45A [Drosophila melanogaster]
FBgn0261064	546.667	282.667	15.6867	7.46667	-1.071	0.00258348	--	NP_609186.1 Rabenosyn-5 [Drosophila melanogaster]
FBgn0003165	2042	1066	16.1167	7.35667	-1.13143	0.00259592	pum	NP_001262403.1 pumilio, isoform G [Drosophila melanogaster]
FBgn0038115	401.333	213.667	13.76	6.69333	-1.03968	0.00260444	selenbp1	AAV36940.1 LP16180p, partial [Drosophila melanogaster]
FBgn0030208	1320.67	704.667	28.7867	14.1633	-1.02324	0.00261304	PPP4R2r	NP_525083.2 protein phosphatase 4 regulatory subunit 2-related protein, isoform B [Drosophila melanogaster]
FBgn0032699	398.667	211.667	7.47	3.58	-1.06115	0.00262824	SERAC1	NP_001286055.1 uncharacterized protein Dmel_CG10383, isoform B [Drosophila melanogaster]
FBgn0266053	1346	733.333	18.9533	9.00333	-1.07392	0.00264378	Patl2	NP_001287369.1 protein associated with topo II related - 1, isoform B [Drosophila melanogaster]
FBgn0036448	1685.33	840.333	15.1133	6.87667	-1.13604	0.00265158	PTPN23	NP_648722.2 myopic [Drosophila melanogaster]
FBgn0042134	6013.33	3131.67	81.3367	38.9333	-1.0629	0.00270947	Capr	NP_001287107.1 caprin, isoform B [Drosophila melanogaster]
FBgn0027949	420.667	196.333	16.33	7.00667	-1.22072	0.00273005	--	NP_609991.1 msb1l [Drosophila melanogaster]
FBgn0002909	374.667	178	4.91667	2.15333	-1.19111	0.00273805	mus312	NP_729234.2 mutagen-sensitive 312, isoform E [Drosophila melanogaster]
FBgn0040347	547	283.333	13.34	6.40333	-1.05886	0.00274578	Mus81	NP_569873.1 mus81 [Drosophila melanogaster]
FBgn0026326	711	366.333	15.4133	7.32	-1.07426	0.00278006	--	NP_610477.2 mitotic arrest-deficient 1 [Drosophila melanogaster]
FBgn0038889	422.667	200.667	4.76667	2.1	-1.18259	0.00284657	Fancm	NP_001262806.1 fanconi anemia group M helicase, isoform B [Drosophila melanogaster]
FBgn0035111	1047	507	15.5267	6.89667	-1.17078	0.00285687	DIS3L2	NP_728490.1 Dis3 like 3'-5' exoribonuclease 2, isoform C [Drosophila melanogaster]
FBgn0020370	4009.67	2101	49.3133	23.76	-1.05344	0.00285971	TppII	NP_725252.1 tripeptidyl-peptidase II, isoform D [Drosophila melanogaster]
FBgn0086451	1900.67	915.667	15.7967	6.90667	-1.19356	0.00286196	l(2)k09022	NP_609079.2 lethal (2) k09022 [Drosophila melanogaster]
FBgn0266083	648.333	272.333	4.98	1.91333	-1.38006	0.00287899	--	NP_001188998.1 over compensating males, isoform B [Drosophila melanogaster]
FBgn0260397	442	213	6.34333	2.82667	-1.16614	0.00289679	Su(var)3-3	NP_649194.1 suppressor of variegation 3-3, isoform A [Drosophila melanogaster]
FBgn0285892	454	223.667	4.27	1.91	-1.16066	0.002904	tea	NP_724855.2 telomere ends associated, isoform E [Drosophila melanogaster]
FBgn0259990	199.333	86.3333	6.10333	2.44	-1.32272	0.00290975	--	NP_001163752.1 uncharacterized protein Dmel_CG42487 [Drosophila melanogaster]
FBgn0046225	255	128	6.41667	2.95667	-1.11785	0.00291523	--	NP_001287289.1 uncharacterized protein Dmel_CG17230, isoform C [Drosophila melanogaster]
FBgn0031266	1281.67	694.667	16.3733	8.09667	-1.01595	0.00292038	SF3B1	NP_001259837.1 splicing factor 3b subunit 1, isoform B [Drosophila melanogaster]
FBgn0020224	1984.67	1033.67	34.9067	16.7933	-1.05561	0.00292305	cblb	NP_648224.1 Cbl proto-oncogene, isoform B [Drosophila melanogaster]
FBgn0003042	346.333	176.333	7.43	3.49333	-1.08876	0.00292437	Pc	NP_524199.1 polycomb [Drosophila melanogaster]
FBgn0035176	207	60.3333	12.6067	3.22333	-1.96756	0.00293217	--	NP_612072.2 uncharacterized protein Dmel_CG13905 [Drosophila melanogaster]
FBgn0261268	1947.33	1007.33	31.49	14.4333	-1.12549	0.00295659	cul3a	NP_723909.2 cullin 3, isoform F [Drosophila melanogaster]
FBgn0027504	1156	582.667	15.6533	7.16	-1.12844	0.00296273	ball	NP_001260913.1 uncharacterized protein Dmel_CG8878, isoform C [Drosophila melanogaster]
FBgn0037218	1150	626.667	14.2967	7.09	-1.01182	0.00296296	GAK	NP_649438.1 auxilin, isoform B [Drosophila melanogaster]
FBgn0004656	1964.67	1104	13.2067	6.30333	-1.06708	0.00298134	fs(1)h	NP_001259321.1 female sterile (1) homeotic, isoform G [Drosophila melanogaster]
FBgn0261710	3378.33	1789.33	21.6267	10.41	-1.05484	0.00299483	--	NP_001245614.1 no circadian temperature entrainment, isoform C [Drosophila melanogaster]
FBgn0260012	1537	806.667	17.2533	8.41	-1.0367	0.00299599	pds5a-b	NP_001246271.1 precocious dissociation of sisters 5, isoform B [Drosophila melanogaster]
FBgn0033557	1014.33	509	16.6333	7.70667	-1.1099	0.00299693	PWP2	NP_001286296.1 uncharacterized protein Dmel_CG12325, isoform B [Drosophila melanogaster]
FBgn0035815	23.6667	63	0.55	1.30667	1.24839	0.00300054	Snmp2	NP_001163372.1 sensory neuron membrane protein 2, isoform C [Drosophila melanogaster]
FBgn0038418	197.667	78.3333	3.17667	1.17	-1.44101	0.00300315	--	NP_650534.2 poils au dos [Drosophila melanogaster]
FBgn0029840	1231	653.333	9.33667	4.51	-1.04978	0.00300316	Rptor	NP_001284924.1 raptor, isoform C [Drosophila melanogaster]
FBgn0284252	1349.67	729.333	18.6067	9.16667	-1.02135	0.00301648	Letm1	NP_611922.1 leucine zipper and EF-hand containing transmembrane protein 1, isoform B [Drosophila melanogaster]
FBgn0033569	554.333	281.333	11.83	5.52	-1.09971	0.00304795	--	NP_610628.2 uncharacterized protein Dmel_CG12942 [Drosophila melanogaster]
FBgn0029979	3024.67	1667.33	21.7	10.7433	-1.01425	0.00305976	DDX5	NP_001284994.1 maheshvara, isoform C [Drosophila melanogaster]
FBgn0037332	517.333	261.667	7.03667	3.26667	-1.10707	0.00307845	Hlcs	NP_001287175.1 holocarboxylase synthetase, isoform C [Drosophila melanogaster]
FBgn0036382	104.333	278	11.5533	26.0167	1.17113	0.00308444	--	NP_648666.1 uncharacterized protein Dmel_CG13737, isoform A [Drosophila melanogaster]
FBgn0015778	6666.33	3570.67	83.6	40.0267	-1.06254	0.0030985	G3BP2	AAF68949.1 rasputin [Drosophila melanogaster]
FBgn0262730	519.333	243	3.70667	1.52667	-1.27974	0.00311657	TMEM132C	NP_001284932.1 detonator, isoform D [Drosophila melanogaster]
FBgn0004390	912	472.667	9.03333	4.23667	-1.09233	0.00315416	RasGAP1	NP_524014.2 Ras GTPase activating protein 1, isoform A [Drosophila melanogaster]
FBgn0030268	2245	1243.33	33.56	16.5333	-1.02137	0.00318736	Klp10A	NP_001285109.1 Kinesin-like protein at 10A, isoform F [Drosophila melanogaster]
FBgn0024330	376	183.667	12.26	5.49	-1.15908	0.00318869	MED6	NP_001163577.1 mediator complex subunit 6, isoform C [Drosophila melanogaster]
FBgn0038597	1026.67	553	18.7367	9.29667	-1.01108	0.00321471	Wdr3	NP_650705.1 uncharacterized protein Dmel_CG8064 [Drosophila melanogaster]
FBgn0004865	768.667	415	14.15	6.96	-1.02364	0.00322355	Eip78C	NP_001246862.1 Ecdysone-induced protein 78C, isoform D [Drosophila melanogaster]
FBgn0000247	768.667	387.667	6.11667	2.78667	-1.13421	0.00323828	Rcbtb2	NP_001287593.1 claret, isoform C [Drosophila melanogaster]
FBgn0283682	1432.67	785.667	16.34	8.14667	-1.00413	0.00325219	Ge-1	NP_609486.2 Ge-1, isoform A [Drosophila melanogaster]
FBgn0025455	1269.33	655.333	13.6467	6.33	-1.10827	0.00326315	CycT	NP_001261992.1 cyclin T, isoform C [Drosophila melanogaster]
FBgn0004367	338.333	154.667	2.28667	0.956667	-1.25716	0.00335761	mei-41	NP_523369.2 meiotic 41 [Drosophila melanogaster]
FBgn0026577	933	457.667	5.68	2.52333	-1.17056	0.00343493	RSF1	NP_001286123.1 uncharacterized protein Dmel_CG8677, isoform C [Drosophila melanogaster]
FBgn0035137	495	258.333	6.60333	3.13333	-1.0755	0.00344697	--	NP_612034.1 uncharacterized protein Dmel_CG1233, isoform B [Drosophila melanogaster]
FBgn0003285	129.667	56.6667	1.42667	0.573333	-1.3152	0.00345491	rst	XP_033168681.1 irregular chiasm C-roughest protein [Drosophila mauritiana]
FBgn0022764	3172.33	1647	21.27	10.1633	-1.06545	0.00345911	Sin3a	NP_001246282.1 Sin3A, isoform G [Drosophila melanogaster]
FBgn0261383	678	329.667	6.19667	2.76333	-1.16508	0.00346973	IntS6	NP_001259259.1 integrator 6, isoform C [Drosophila melanogaster]
FBgn0052834	16.6667	105.333	0.573333	2.94	2.35837	0.0034706	TRYP2	NP_001188996.1 uncharacterized protein Dmel_CG32834 [Drosophila melanogaster]
FBgn0034521	421	197	7.95	3.40667	-1.22259	0.00349576	MGAT1	NP_525117.2 mannosyl (alpha-1,3-)-glycoprotein beta-1,2-N-acetylglucosaminyltransferase [Drosophila melanogaster]
FBgn0024245	257.667	129.667	5.16333	2.39667	-1.10727	0.00351297	dnt	NP_001260567.1 doughnut on 2, isoform B [Drosophila melanogaster]
FBgn0034407	31	122.667	3.93667	13.3267	1.75927	0.00351767	--	AAN71556.1 RH29451p, partial [Drosophila melanogaster]
FBgn0045035	523	238.333	3.31333	1.38	-1.26362	0.0035273	tefu	NP_001036712.1 telomere fusion [Drosophila melanogaster]
FBgn0050169	399	183.667	6.43	2.72	-1.24121	0.00355771	Brca2	NP_611925.2 BRCA2, DNA repair associated [Drosophila melanogaster]
FBgn0261574	1193.33	548	4.50667	1.87	-1.26902	0.00359059	kug	NP_001027138.2 kugelei, isoform D [Drosophila melanogaster]
FBgn0263998	1110	544.333	13.5633	6.01667	-1.17268	0.00361407	Ack-like	NP_001260934.1 activated Cdc42 kinase-like, isoform C [Drosophila melanogaster]
FBgn0052024	31	103.333	2.44	6.77	1.47227	0.00365457	--	NP_729417.2 uncharacterized protein Dmel_CG32024 [Drosophila melanogaster]
FBgn0086129	979.667	509.333	14.09	6.75333	-1.061	0.0036573	Rbbp6	NP_611884.1 something that sticks like glue, isoform A [Drosophila melanogaster]
FBgn0022942	964.667	473.333	16.92	7.64	-1.14709	0.00369053	Cbp80	NP_524750.2 cap binding protein 80, isoform B [Drosophila melanogaster]
FBgn0015589	904.333	436	5.74667	2.52	-1.1893	0.00370332	Apc	NP_001263046.1 APC-like, isoform B [Drosophila melanogaster]
FBgn0038860	226.667	111.333	4.79667	2.17	-1.14434	0.00371382	Ice2	NP_650946.3 interacts with the C terminus of ELL 2, isoform A [Drosophila melanogaster]
FBgn0283461	88.6667	662.667	13.37	83.5633	2.64387	0.00374358	Drs	NP_523901.1 drosomycin [Drosophila melanogaster]
FBgn0014007	1215.67	658.667	12.55	6.22	-1.0127	0.00377405	Ptp69D	NP_524048.2 protein tyrosine phosphatase 69D, isoform A [Drosophila melanogaster]
FBgn0034496	1186	624.333	23.1767	11.23	-1.04532	0.00378624	DDX24	NP_611467.1 uncharacterized protein Dmel_CG9143 [Drosophila melanogaster]
FBgn0002926	2223.33	913.667	14.4333	5.41	-1.4157	0.00379255	ndl	NP_523947.2 nudel [Drosophila melanogaster]
FBgn0283503	449.333	232.333	4.23	1.98	-1.09516	0.00381637	Neurl4	NP_648688.2 neuralized E3 ubiquitin protein ligase 4 [Drosophila melanogaster]
FBgn0032049	75.6667	881	3.80667	35.6	3.22528	0.00384511	AAEL006169	NP_001285756.1 beta-site APP-cleaving enzyme, isoform B [Drosophila melanogaster]
FBgn0031820	1155	633	11.1367	5.56333	-1.0013	0.00385007	Daxx	NP_001285675.1 Daxx-like protein, isoform B [Drosophila melanogaster]
FBgn0026761	1103.67	589.667	25.64	12.48	-1.03878	0.00385843	Trap1	NP_001260726.1 Trap1, isoform B [Drosophila melanogaster]
FBgn0013435	312.333	166	13.3033	6.46667	-1.04069	0.00389133	Cdk10	NP_523674.1 Cdc2-related kinase [Drosophila melanogaster]
FBgn0264855	2548.33	1417	30.0833	14.9367	-1.01011	0.0038943	AP-2alpha	NP_995607.1 adaptor protein complex 2, alpha subunit, isoform B [Drosophila melanogaster]
FBgn0001612	793.667	420.667	11.76	5.74333	-1.03393	0.00390551	Grip91	NP_524919.2 Gamma-tubulin ring protein 91 [Drosophila melanogaster]
FBgn0011826	1538	812.333	24.6433	11.9367	-1.0458	0.00390707	Pp2B-14D	NP_001245715.1 protein phosphatase 2B at 14D, isoform C [Drosophila melanogaster]
FBgn0037109	1165	637	13.3367	6.58	-1.01924	0.00390855	MED1	NP_649341.1 mediator complex subunit 1, isoform A [Drosophila melanogaster]
FBgn0011224	1978.67	1117	29.1133	14.4867	-1.00695	0.00391812	PTBP1	NP_001247399.1 hephaestus, isoform Y [Drosophila melanogaster]
FBgn0011774	458.667	242.333	11.4267	5.52	-1.04966	0.00394273	Irbp	NP_536773.1 inverted repeat-binding protein, isoform A [Drosophila melanogaster]
FBgn0020497	3341.67	1803.33	39.9033	19.6567	-1.02149	0.00394514	emb	NP_001303316.1 embargoed, isoform B [Drosophila melanogaster]
FBgn0011211	17561.7	9414.33	415.967	203.93	-1.02839	0.00398472	blw	NP_726243.1 bellwether [Drosophila melanogaster]
FBgn0005386	646	286	4.57	1.84	-1.31249	0.00398814	ash1	NP_001246834.1 absent, small, or homeotic discs 1, isoform C [Drosophila melanogaster]
FBgn0020887	1021	551.333	13.74	6.82	-1.01054	0.00401073	Su(z)12	NP_730465.1 Su(z)12, isoform B [Drosophila melanogaster]
FBgn0010905	1374.33	741	9.53333	4.53333	-1.07241	0.00402611	PPP1R9A	NP_001246578.1 spinophilin, isoform J [Drosophila melanogaster]
FBgn0028695	3916	2105	68.4933	33.7533	-1.02093	0.00404499	PSMD2	NP_649158.1 regulatory particle non-ATPase 1 [Drosophila melanogaster]
FBgn0030769	58.3333	151.667	4.37667	9.49333	1.11708	0.00409142	--	NP_001259625.1 uncharacterized protein Dmel_CG13012, isoform C [Drosophila melanogaster]
FBgn0029688	1888.33	1001	11.25	5.42	-1.05356	0.00412553	lva	NP_001284849.1 lava lamp, isoform D [Drosophila melanogaster]
FBgn0283657	1700	946.333	15.2	7.52	-1.01527	0.00413312	TLK2	NP_001138153.1 Tousled-like kinase, isoform G [Drosophila melanogaster]
FBgn0014075	1785.67	896	17.83	8.21667	-1.11768	0.00413837	Uggt	NP_524151.2 UDP-glucose-glycoprotein glucosyltransferase [Drosophila melanogaster]
FBgn0037301	621.333	317	10.3167	4.78667	-1.10788	0.00417424	MMS19	NP_649519.1 Mms19 [Drosophila melanogaster]
FBgn0036259	17.6667	49	0.476667	1.17333	1.29956	0.00422068	--	NP_648554.3 uncharacterized protein Dmel_CG9760, isoform C [Drosophila melanogaster]
FBgn0034975	923	425.333	6.94333	2.91	-1.25461	0.00426804	Kat6b	NP_001286823.1 enoki mushroom, isoform B [Drosophila melanogaster]
FBgn0039727	457.667	210	2.21667	0.936667	-1.24278	0.00428084	Vps13b	NP_651753.2 vacuolar protein sorting 13B, isoform A [Drosophila melanogaster]
FBgn0051368	835	442	9.59333	4.65333	-1.04377	0.00428346	AQR	NP_996198.2 uncharacterized protein Dmel_CG31368, isoform D [Drosophila melanogaster]
FBgn0037364	653.667	309	14.9767	6.63	-1.17564	0.0042933	RAB23	NP_649574.1 Rab23 [Drosophila melanogaster]
FBgn0042173	20.3333	72	1.01	3.02333	1.58178	0.00431787	PHR	NP_724615.1 uncharacterized protein Dmel_CG18853 [Drosophila melanogaster]
FBgn0030366	2591.67	1407	25.1767	12.5633	-1.00287	0.00431931	Usp7	NP_572779.2 Ubiquitin-specific protease 7, isoform B [Drosophila melanogaster]
FBgn0040827	107.667	264	9.85667	20.82	1.0788	0.00432689	--	NP_001286991.1 uncharacterized protein Dmel_CG13315, isoform B [Drosophila melanogaster]
FBgn0033740	223.667	105.667	5.31667	2.33	-1.19019	0.0043307	dgt5	NP_001286349.1 dim gamma-tubulin 5, isoform B [Drosophila melanogaster]
FBgn0053095	943	506	14.0033	6.94667	-1.01138	0.00434316	--	NP_001027210.1 uncharacterized protein Dmel_CG33095, isoform B [Drosophila melanogaster]
FBgn0010355	1120	617	9.14333	4.55667	-1.00474	0.00436193	Taf1	NP_001246952.1 TBP-associated factor 1, isoform E [Drosophila melanogaster]
FBgn0026630	606.667	344	16.34	8.13333	-1.00649	0.00437477	nes	NP_524157.2 nessy, isoform A [Drosophila melanogaster]
FBgn0052452	535.667	278.333	13.9433	6.64667	-1.06887	0.0043994	--	NP_001287148.1 uncharacterized protein Dmel_CG32452, isoform C [Drosophila melanogaster]
FBgn0031575	474.333	239.667	8.46	3.96667	-1.09273	0.00443241	cep97	NP_608811.2 centrosomal protein 97kDa, isoform B [Drosophila melanogaster]
FBgn0034253	178	70.3333	1.76	0.64	-1.45943	0.00443671	--	NP_611239.1 uncharacterized protein Dmel_CG10936 [Drosophila melanogaster]
FBgn0033802	388	196.333	5.41	2.46667	-1.13307	0.00453263	--	NP_001260943.1 uncharacterized protein Dmel_CG17724, isoform E [Drosophila melanogaster]
FBgn0039846	563	303.667	11.11	5.52	-1.00912	0.00455301	PNPT1	NP_001097990.2 polynucleotide phosphorylase, isoform E [Drosophila melanogaster]
FBgn0032817	627.333	298.333	2.78333	1.2	-1.21378	0.00456003	--	NP_609998.1 uncharacterized protein Dmel_CG10631 [Drosophila melanogaster]
FBgn0031698	839.333	439.667	4.53	2.14333	-1.07965	0.00456067	--	NP_001097088.3 nuclear receptor coactivator 6, isoform F [Drosophila melanogaster]
FBgn0039631	232	118	4.03333	1.88	-1.10124	0.00456457	Sirt7	NP_651664.2 sirtuin 7 [Drosophila melanogaster]
FBgn0034113	333.667	170.333	4.39667	2.06333	-1.09143	0.004601	ibtk	NP_611117.2 uncharacterized protein Dmel_CG8060 [Drosophila melanogaster]
FBgn0037531	232	100.667	3.74333	1.51667	-1.30342	0.00461453	lds	NP_001246974.1 uncharacterized protein Dmel_CG10445, isoform D [Drosophila melanogaster]
FBgn0025739	387.667	177	7.71667	3.31667	-1.21824	0.0046961	--	NP_525072.2 partner of numb [Drosophila melanogaster]
FBgn0085478	485.333	259	5.38667	2.52667	-1.09216	0.00470597	ZDHHC8	NP_727339.3 uncharacterized protein Dmel_CG34449, isoform A [Drosophila melanogaster]
FBgn0038853	460	251.667	4.58333	2.29	-1.00105	0.00472881	ARHGAP39	NP_650939.2 Rho GTPase activating protein at 93B [Drosophila melanogaster]
FBgn0003292	248.667	109.667	3.98667	1.63333	-1.28736	0.00473743	rt	NP_524025.2 rotated abdomen [Drosophila melanogaster]
FBgn0010100	5096.67	2724	98.1633	47.4367	-1.04918	0.00479047	aco-2	NP_001097186.2 mitochondrial aconitase 1, isoform E [Drosophila melanogaster]
FBgn0037290	128	391	6.72667	17.06	1.34265	0.00480992	--	NP_649509.1 uncharacterized protein Dmel_CG1124 [Drosophila melanogaster]
FBgn0035691	67	27	1.61	0.586667	-1.45645	0.00484533	--	NP_648036.1 uncharacterized protein Dmel_CG7386 [Drosophila melanogaster]
FBgn0032723	578.333	275.333	4.95333	2.18333	-1.18187	0.00484712	SCAPER	NP_609917.2 short spindle 3, isoform A [Drosophila melanogaster]
FBgn0013683	34.3333	145.667	7.15333	24.4033	1.77039	0.00488333	-	-
FBgn0034997	493.333	247.667	8.96	3.99333	-1.16591	0.00490867	Smpd1	NP_001246491.1 uncharacterized protein Dmel_CG3376, isoform C [Drosophila melanogaster]
FBgn0261797	2135	1006.67	8.11	3.46333	-1.22754	0.00491085	Dhc64C	NP_001261432.1 dynein heavy chain 64C, isoform I [Drosophila melanogaster]
FBgn0032883	528.667	274.667	9.33667	4.44	-1.07235	0.00493253	DHX36	NP_001260639.1 RHAU helicase, isoform B [Drosophila melanogaster]
FBgn0002989	400.667	203.667	7.37667	3.45333	-1.09498	0.00493302	okr	AAL39744.2 LD35220p, partial [Drosophila melanogaster]
FBgn0000063	276.667	119.333	6.84	2.75333	-1.31282	0.00495609	TTK	NP_001262677.1 monopolar spindle 1, isoform B [Drosophila melanogaster]
FBgn0086698	227	115.667	3.66	1.69333	-1.11198	0.00495804	frtz	NP_001259879.1 fritz, isoform B [Drosophila melanogaster]
FBgn0266717	2248.33	1111.33	7.96333	3.53333	-1.17234	0.00496839	BIRC6	NP_001262460.1 BIR repeat containing ubiquitin-conjugating enzyme, isoform B [Drosophila melanogaster]
FBgn0031068	335.333	169	16.04	7.41333	-1.11348	0.00503812	Gfer	NP_001259731.1 augmenter of liver regeneration, isoform B [Drosophila melanogaster]
FBgn0026432	301.667	142.667	3.47333	1.50667	-1.20496	0.00510782	--	NP_648537.2 Grip163 [Drosophila melanogaster]
FBgn0085282	36.3333	89	4.23	8.95	1.08123	0.00527949	--	NP_001097636.1 uncharacterized protein Dmel_CG34253 [Drosophila melanogaster]
FBgn0036621	1269.67	717.667	15.9033	7.85	-1.01856	0.00531023	Rc3h1	NP_001261940.1 roquin, isoform C [Drosophila melanogaster]
FBgn0050196	21.3333	56.6667	2.42667	5.56333	1.19697	0.00534608	--	NP_726220.1 uncharacterized protein Dmel_CG30196 [Drosophila melanogaster]
FBgn0030141	562.667	287	12.8133	5.93667	-1.10992	0.00537788	Gga1	NP_572571.1 Golgi-localized, gamma-adaptin ear containing, ARF binding protein [Drosophila melanogaster]
FBgn0032669	149.667	349	9.34667	18.7	1.00051	0.00541975	--	NP_609868.1 uncharacterized protein Dmel_CG15155, isoform A [Drosophila melanogaster]
FBgn0261990	104.333	243.333	9.22667	18.54	1.00676	0.00542741	--	NP_001188920.1 uncharacterized protein Dmel_CG42808 [Drosophila melanogaster]
FBgn0033460	1059	581.333	12.2533	6.09	-1.00866	0.00542782	SEC24B	NP_001286257.1 secretory 24AB, isoform B [Drosophila melanogaster]
FBgn0058298	9.66667	41	0.493333	1.72333	1.80457	0.0054311	--	NP_001036631.1 uncharacterized protein Dmel_CG40298 [Drosophila melanogaster]
FBgn0031948	170	78.6667	3.79667	1.60667	-1.24066	0.0054361	SELENOI	NP_001285718.1 uncharacterized protein Dmel_CG7149, isoform C [Drosophila melanogaster]
FBgn0003862	918	429	3.90667	1.61667	-1.27292	0.00544896	trx	NP_476769.1 trithorax, isoform D [Drosophila melanogaster]
FBgn0023130	339.333	182	8.19	4.03333	-1.02189	0.0054857	a6	NP_001259141.1 a6, isoform B [Drosophila melanogaster]
MSTRG.4581	5.66667	28.6667	0.396667	1.68	2.08246	0.00553774	--	IP07237p, partial [Drosophila melanogaster]
FBgn0038611	4736.67	2187.67	74.2533	31.8967	-1.21905	0.00564962	--	NP_650718.2 uncharacterized protein Dmel_CG14309 [Drosophila melanogaster]
FBgn0051300	30.6667	95.3333	1.15333	3.13667	1.44342	0.00565487	--	NP_651373.2 uncharacterized protein Dmel_CG31300 [Drosophila melanogaster]
FBgn0005632	3011.33	1568.33	17.26	8.12	-1.08788	0.00567693	faf	NP_524612.2 fat facets, isoform A [Drosophila melanogaster]
FBgn0039066	1153.33	586.667	20.9333	9.95667	-1.07207	0.00570154	EloA	NP_732846.1 elongin A, isoform A [Drosophila melanogaster]
FBgn0028734	2577.33	1430.67	39.7633	19.4533	-1.03142	0.00572127	Fmr1	NP_001247017.1 Fmr1, isoform G [Drosophila melanogaster]
FBgn0261934	745.333	376.667	5.85	2.77333	-1.07682	0.00573091	CECR2	NP_001261480.1 dikar, isoform F [Drosophila melanogaster]
FBgn0033195	177	87	5.36	2.41333	-1.15121	0.00575779	--	NP_610300.1 uncharacterized protein Dmel_CG1360 [Drosophila melanogaster]
FBgn0033075	836.667	408.667	9.19	4.07	-1.17504	0.00576355	PLD1	NP_001137610.1 phospholipase D, isoform F [Drosophila melanogaster]
FBgn0031554	146.333	411.333	17.81	41.7233	1.22817	0.00588263	--	NP_001334671.1 uncharacterized protein Dmel_CG15418, isoform A [Drosophila melanogaster]
FBgn0033392	428.667	229	8.68	4.29667	-1.01448	0.00593076	gnptab	NP_610469.3 uncharacterized protein Dmel_CG8027 [Drosophila melanogaster]
FBgn0021760	936.333	486.333	8.49333	4.04333	-1.07079	0.00597868	chb	NP_524651.2 chromosome bows, isoform A [Drosophila melanogaster]
FBgn0003459	323	157.333	4.67667	2.1	-1.15509	0.00599764	--	NP_001261839.1 stonewall, isoform C [Drosophila melanogaster]
FBgn0043884	3201.33	1600.33	12.2967	5.47333	-1.16778	0.0061876	mask	NP_001247280.1 multiple ankyrin repeats single KH domain, isoform C [Drosophila melanogaster]
FBgn0023518	565	282.667	3.68	1.67	-1.13986	0.00624514	trr	NP_726773.2 trithorax-related, isoform D [Drosophila melanogaster]
FBgn0034308	737.333	414.333	12.6467	6.27333	-1.01145	0.00624561	CG10915	NP_001286565.1 uncharacterized protein Dmel_CG10915, isoform B [Drosophila melanogaster]
FBgn0263968	1031	551.667	5.28667	2.54333	-1.05564	0.00625665	nonC	NP_001284967.1 no-on-and-no-off transient C, isoform B [Drosophila melanogaster]
FBgn0260932	89.3333	31.6667	3.60667	1.19	-1.5997	0.00630938	cuff	ABC86387.1 IP10749p, partial [Drosophila melanogaster]
FBgn0039521	3.66667	19	0.333333	1.50333	2.17313	0.00631713	--	NP_651565.1 uncharacterized protein Dmel_CG5402 [Drosophila melanogaster]
FBgn0034807	36.3333	146.333	2.29	7.93333	1.79258	0.00637296	TRYP3	NP_611744.1 uncharacterized protein Dmel_CG9897, isoform A [Drosophila melanogaster]
FBgn0037142	480	262.333	4.77333	2.38	-1.00404	0.0064272	--	NP_001262199.1 uncharacterized protein Dmel_CG14562, isoform B [Drosophila melanogaster]
FBgn0035793	1292	702.333	14.0333	6.94	-1.01585	0.00643313	Bag6-a	NP_001137904.1 uncharacterized protein Dmel_CG7546, isoform D [Drosophila melanogaster]
FBgn0032821	591.667	320.667	4.81333	2.37667	-1.0181	0.00649462	CdGAPr	NP_001260600.1 Cd GTPase activating protein-related, isoform D [Drosophila melanogaster]
FBgn0031434	406	223.333	13.76	6.84333	-1.00771	0.00650999	insv	NP_001285566.1 insensitive, isoform B [Drosophila melanogaster]
FBgn0033816	825.333	441	20.3133	9.96667	-1.02724	0.00651484	CG4679	NP_610854.1 uncharacterized protein Dmel_CG4679 [Drosophila melanogaster]
FBgn0004101	367.667	191.667	8.54	4.05333	-1.07513	0.00655914	bs	NP_001286837.1 blistered, isoform C [Drosophila melanogaster]
FBgn0035986	604.667	335.667	10.8533	5.24333	-1.04958	0.00666508	--	NP_001246696.1 uncharacterized protein Dmel_CG4022, isoform B [Drosophila melanogaster]
FBgn0005683	456	225.667	11.8733	5.44	-1.12605	0.00673765	G2E3	NP_001260348.1 pineapple eye, isoform B [Drosophila melanogaster]
FBgn0042178	236	116	3.38	1.53667	-1.13722	0.00679485	IPO4	NP_730182.1 apollo, isoform A [Drosophila melanogaster]
FBgn0051989	264	129.667	3.54667	1.6	-1.14839	0.006807	--	NP_001162887.1 chromosome associated protein D3, isoform B [Drosophila melanogaster]
FBgn0000307	1451.33	755.333	11.89	5.64333	-1.07513	0.00683182	chif	NP_523583.2 chiffon, isoform A [Drosophila melanogaster]
FBgn0001137	379.667	205.333	11.7433	5.83	-1.01027	0.00689227	grk	NP_476568.2 gurken [Drosophila melanogaster]
FBgn0051681	56.6667	408	3.42333	21.01	2.6176	0.0069127	betaTry	ACI31290.1 IP19041p, partial [Drosophila melanogaster]
FBgn0026206	1471.33	750	10.81	4.95333	-1.12589	0.00697118	TRIM24	NP_001259377.1 meiotic P26, isoform C [Drosophila melanogaster]
FBgn0037773	146.667	75.6667	6.59	3.10667	-1.08491	0.00711173	--	NP_001163579.1 uncharacterized protein Dmel_CG5359, isoform B [Drosophila melanogaster]
FBgn0262126	1685.67	897	20.79	9.95	-1.06312	0.0072411	SEC24C	NP_001259918.1 secretory 24CD, isoform C [Drosophila melanogaster]
FBgn0029970	368	198.333	7.51333	3.74667	-1.00385	0.00726817	NEK2	NP_572415.1 Nek2 [Drosophila melanogaster]
FBgn0029006	1090.67	589.333	11.7833	5.83333	-1.01436	0.00730151	Smurf	NP_001261061.1 SMAD specific E3 ubiquitin protein ligase, isoform B [Drosophila melanogaster]
FBgn0036294	398.333	202.333	14.7133	6.89333	-1.09385	0.00732347	--	NP_001261767.1 uncharacterized protein Dmel_CG10654, isoform B [Drosophila melanogaster]
FBgn0035336	566	300.667	11.0967	5.41	-1.03643	0.00734377	CG9004	NP_647717.1 uncharacterized protein Dmel_CG9004 [Drosophila melanogaster]
FBgn0034307	224.667	118	5.84	2.80333	-1.05883	0.00735136	NOA1	NP_611297.3 uncharacterized protein Dmel_CG10914 [Drosophila melanogaster]
FBgn0039169	286.667	148	4.35667	2.06667	-1.07592	0.0073593	SP4	NP_651232.1 Sp1-like factor for pairing sensitive-silencing, isoform A [Drosophila melanogaster]
FBgn0038654	48.6667	139.667	3.46333	8.98333	1.37509	0.0074188	--	NP_001262716.1 uncharacterized protein Dmel_CG14298, isoform B [Drosophila melanogaster]
FBgn0002673	667.667	356.667	18.1667	8.82333	-1.0419	0.00748341	twe	NP_001260491.1 twine, isoform B [Drosophila melanogaster]
FBgn0027070	130	60	3.68667	1.57333	-1.22849	0.00749747	Ugt2b17	NP_609911.1 UDP-glycosyltransferase family 36 member E1, isoform D [Drosophila melanogaster]
FBgn0053872	57	157	5.25667	12.8733	1.29217	0.00753069	--	-
FBgn0053874	57	157	5.25667	12.8733	1.29217	0.00753069	--	-
FBgn0053876	57	157	5.25667	12.8733	1.29217	0.00753069	--	-
FBgn0002887	427.667	218.333	5.83333	2.76667	-1.07617	0.00757004	ERCC5	NP_001027230.1 mutagen-sensitive 201, isoform C [Drosophila melanogaster]
FBgn0259991	276.333	147.667	6.77667	3.33667	-1.02217	0.00774994	--	NP_001163729.1 uncharacterized protein Dmel_CG42488 [Drosophila melanogaster]
FBgn0036032	395.667	195.333	3.71	1.68	-1.14296	0.00777962	--	NP_648347.2 uncharacterized protein Dmel_CG16711, isoform C [Drosophila melanogaster]
FBgn0020379	296	154	3.50333	1.67	-1.06888	0.00779447	Rfx2	NP_001247023.2 Rfx, isoform H [Drosophila melanogaster]
FBgn0250911	554.667	294.333	5.75667	2.81333	-1.03295	0.00779908	KIAA1143	NP_001137876.1 uncharacterized protein Dmel_CG42245 [Drosophila melanogaster]
FBgn0036398	1088.33	579	4.68	2.23	-1.06946	0.00791232	Kmt2e	NP_001261819.1 upSET, isoform B [Drosophila melanogaster]
