# Supplementary material for: Cyromazine affects the ovarian germ cells of Drosophila via the ecdysone signaling pathway
Source: Front Physiol. 2022 Sep 29;13:992306. doi: 10.3389/fphys.2022.992306 (PMC9557234; doi:10.3389/fphys.2022.992306)
Supplement: Supplementary file 9 [file Table5.xlsx]

## Sheet: Sheet1
Supplementary Table S5: Differential expression of cyromazine responsive genes in Drosophila's larval ovaries
Gene ID	Count (Control)	Count (Treatment)	FPKM (Control)	FPKM (Treatment)	log2(fc)	P-value	Symbol	Description
FBgn0040104	40.3333	679	1.66333	29.9533	4.17057	1.2716e-09	CLEC6A	NP_652637.1 lectin-24A [Drosophila melanogaster]
FBgn0028920	26	308	1.24	13.3967	3.43346	5.26107e-09	--	ACT80130.1 LP19506p, partial [Drosophila melanogaster]
FBgn0002535	14	144.667	1.07333	10.7267	3.32103	4.52604e-08	Lcp4	NP_001260804.1 larval cuticle protein 4, isoform B [Drosophila melanogaster]
FBgn0250815	2	497.667	0.0933333	20.7233	7.79465	9.22512e-07	Jon99Cii	AAL49280.1 RE74144p [Drosophila melanogaster]
FBgn0264478	38.6667	182.333	4.77667	20.7133	2.11648	2.37351e-06	--	NP_001261562.1 uncharacterized protein Dmel_CG43886 [Drosophila melanogaster]
FBgn0010358	2	221	0.103333	10.29	6.63779	3.62052e-06	deltaTry	NP_523694.2 deltaTrypsin [Drosophila melanogaster]
FBgn0039094	433.667	1365.33	13.3733	43.3267	1.6959	4.67196e-06	THA2	NP_651161.1 uncharacterized protein Dmel_CG10184 [Drosophila melanogaster]
FBgn0039030	1.33333	24	0.05	0.863333	4.10992	6.93499e-06	ELOVL	NP_651104.1 uncharacterized protein Dmel_CG6660 [Drosophila melanogaster]
FBgn0053462	83.6667	565.333	3.51	24.3733	2.79576	7.99531e-06	MP1	NP_995844.2 uncharacterized protein Dmel_CG33462 [Drosophila melanogaster]
FBgn0044812	390	2811	29.76	228.313	2.93957	1.21843e-05	TotC	NP_536779.2 turandot C [Drosophila melanogaster]
FBgn0052667	850.333	3683.33	93.26	407.387	2.12707	1.73496e-05	--	NP_727495.1 short spindle 7 [Drosophila melanogaster]
FBgn0035358	173.333	31.6667	8.01	1.43667	-2.47908	2.28877e-05	--	NP_647734.1 uncharacterized protein Dmel_CG14949 [Drosophila melanogaster]
FBgn0030929	5.66667	29	0.343333	1.72667	2.33031	3.13216e-05	--	NP_001285405.1 uncharacterized protein Dmel_CG15043, isoform B [Drosophila melanogaster]
FBgn0028996	2.66667	25.3333	0.02	0.166667	3.05889	3.17454e-05	onecut	NP_001259065.1 onecut, isoform B [Drosophila melanogaster]
FBgn0016675	0.333333	15.6667	0.02	0.903333	5.49719	3.24294e-05	lectin-37Da	NP_001188845.1 Galactose-specific C-type lectin, isoform B [Drosophila melanogaster]
FBgn0004430	2.33333	206.333	0.21	15.7867	6.23217	3.50411e-05	LysS	NP_476829.1 lysozyme S [Drosophila melanogaster]
FBgn0038643	0	12	0.001	1.28667	10.3294	3.91778e-05	--	NP_001014639.1 uncharacterized protein Dmel_CG14300 [Drosophila melanogaster]
FBgn0034011	511	1180.67	20.8	46.2567	1.15308	4.68302e-05	--	NP_611031.3 uncharacterized protein Dmel_CG8160 [Drosophila melanogaster]
FBgn0010382	135	7	2.33	0.116667	-4.31987	5.23431e-05	CycE	NP_001246037.1 cyclin E, isoform F [Drosophila melanogaster]
FBgn0030270	391	1107	30.94	86.4767	1.48284	6.22005e-05	--	NP_001245617.1 uncharacterized protein Dmel_CG15199, isoform B [Drosophila melanogaster]
FBgn0028533	6.33333	328.667	0.243333	11.3367	5.54192	6.51761e-05	--	NP_001285913.1 uncharacterized protein Dmel_CG7953, isoform B [Drosophila melanogaster]
FBgn0013276	882.667	2200.67	16.1867	39.5367	1.28839	6.97294e-05	Hsp70Aa	NP_524798.2 Heat-shock-protein-70Ab [Drosophila melanogaster]
FBgn0010359	1.33333	118.333	0.07	5.49333	6.29418	7.2115e-05	deltaTry	NP_523694.2 deltaTrypsin [Drosophila melanogaster]
FBgn0020644	2.33333	20.6667	0.24	1.97	3.03709	7.32922e-05	Lcp65Ab1	NP_524814.2 Lcp65Ab1 [Drosophila melanogaster]
FBgn0003312	0.333333	14.3333	0.01	0.433333	5.43741	8.02178e-05	sad	NP_650123.1 shadow [Drosophila melanogaster]
FBgn0039299	1.66667	16.6667	0.0666667	0.666667	3.32193	0.000109943	to	AAY55827.2 IP10429p, partial [Drosophila melanogaster]
